# Supplementary material for: Mangroves From Rainy to Desert Climates: Baseline Data to Assess Future Changes and Drivers in Colombia
Source: Frontiers journal article supplement (doi:10.3389/ffgc.2022.772271), 2022-03-21
Supplement: Table_1.XLSX [file Table_1.XLSX]

## Sheet: Readme
NAME OF DATABASE:	HELIO_SP.CO v.2
Explanation of acronym:	Hierarchical, Entity-based and Landscape-level Information Observatory for mangrove SPecies in Colombia
Last update:	July, 2021
Citation: Blanco-Libreros JF., López-Rodríguez SR, Valencia-Palacios AM, Pérez-Vega GF, Álvarez-León R (eds.). 2021. HELIO_SP.CO v.2.: Hierarchical Entity-based and Landscape-level Information Observatory for mangrove SPecies in Colombia. A database for macroecological and biogeographical studies of mangroves in mainland Colombia. Universidad de Antioquia. Medellín.
In memorian: Heliodoro Sánchez-Páez (passed 2017). Former PI "Mangroves of Colombia Project"
Original matrix
Variable (units)	Abreviation
Coast	Coast: P=Pacific; CC=Continental Caribbean; OC=Oceanic Caribbean
Location code	AA1a: Initials of department and alphanumerical coding for sites and transects. See location names in the second tab
Latitude	Lat
Longitude	Lon
Species (name)	R=Rhizophora spp.; A=Avicennia germinans; L=Laguncularia racemosa; P=Pelliciera rhizophorae; C=Conocarpus erectus
Density (ind/0,1ha)	DEN
Basal area (m2/0,1ha)	BAS.AREA
Diameter at breast height (cm)	DBH
Relative frequency	REL.FREQ
Relative dominance	REL.DOM
Relative density	REL.DEN
Importance Value Index	IVI
Note 1: empty cells mean that no data was measured or indicated in the original source
Note 2: Data represent the measurements for trees with DBH>15 cm ("fustales" in Spanish)
Note 3: In contrast to HELIO_SP.CO v1, this updated version includes data from 11 locations in San Andrés Island and Old Providence Island (acronym: SA), oceanic territories in the Caribbean (OC) located at 240 km off the coast of Nicaragua
Note 4: In this version, locations in Atlántico were removed due to incompleteness of data (AT1a and AT2a)
Note 5: In this version, height data were removed because they were only available for the Caribbean Coast
Ordination and anova matrices
Coding as above except for:
Basal area (m2/0,1 ha)	BASA
Relative frequency	FREQ
Relative dominance	DOM
Relative density	DENREL
CREDITS:
Conceived by: Juan Felipe Blanco-Libreros (Universidad de Antioquia, Medellín), Ricardo Álvarez-León (Retired Scientist, former co-PI "Mangroves of Colombia Project")
Data entry: Juan F. Blanco Libreros, Sara Raquel López, Ana María Valencia, Édgar Andrés Estrada, Ginna González, Miguel Ballén
Curated by: Juan Felipe Blanco-Libreros, Ana María Valencia, Gloria Fabiola Pérez, Édgar Andrés Estrada
Source: Mangroves of Colombia Project (MMA-OIMT 1996. PD 171-91 Rev. 2 (F) Fase 1)
Source printed reports:
Sánchez-Páez H., Álvarez-León R., Pinto-Nolla F., Sánchez-Alférez AS., Pino-Renjifo JC., García-Hansen I., Acosta-Peñaloza MT. 1997a. Diagnóstico y zonificación Preliminar de los manglares del Caribe de Colombia. Ministerio del Medio Ambiente de Colombia (MMA), Organización Internacional de Maderas Tropicales (OIMT). Santa Fe de Bogotá. pp. 511.
Sánchez-Páez H., Álvarez-León R., Guevara-Mancera OA., Zamora A., Rodríguez-Cruz H., Bravo-Pazmiño HE. 1997b. Diagnóstico y zonificación preliminar de los manglares del Pacífico de Colombia. Ministerio del Medio Ambiente de Colombia, Organización Internacional de Maderas Tropicales. Santa Fe de Bogotá. pp. 343.
Version 1 availability:
Blanco-Libreros, Juan; Álvarez-León, Ricardo, 2018, "HELIO_SP.CO v.1: Hierarchical, Entity-based and Landscape-level Information Observatory for mangrove SPecies in Colombia, version 1.", https://doi.org/10.7910/DVN/GGLRXW, Harvard Dataverse, V1, UNF:6:sD96FgJRjWrXmDUVqhUbqg== [fileUNF]
Blanco-Libreros, J. F., & Álvarez-Leó, R. (2019). Regreso a los manglares de Colombia en una era de datos abiertos, cambios globales y transiciones sociopolíticas: homenaje a Heliodoro Sánchez-Páez. Rev. Acad. Colomb. Cienc. Ex. Fis. Nat., 43(166), 84-97. https://doi.org/10.18257/raccefyn.780
Version 2 associated publication:
Blanco-Libreros, JF, SR López-Rodríguez, AM Valencia-Palacios, GF Pérez-Vega, and R Álvarez-León. 2021. Mangroves from rainy to desert climates: baseline data to assess future changes and drivers in Colombia. Frontiers in Forests and Global Change. Research topic: Drivers of Mangrove Forest Change and its Effects on Biodiversity and Ecosystem Services
https://www.frontiersin.org/research-topics/17175/drivers-of-mangrove-forest-change-and-its-effects-on-biodiversity-and-ecosystem-services

## Sheet: Location_name
Code	Lat	Lon	Location_name	Department
GU2a	12.2333	-71.8667	MOWASI	GUAJIRA
GU1a	11.9167	-71.2833	PUERTO LOPEZ	GUAJIRA
GU3a	11.3333	-73.2	ENEA	GUAJIRA
MA1b	11.3333	-74.05	BAHÍA DE CINTO	MAGDALENA
MA1a	11.3167	-74.1167	BAHÍA DE CHENGUE	MAGDALENA
GU4a	11.2667	-73.3167	PLAYA DE LOS HOLANDESES	GUAJIRA
MA2a	11.05	-74.7333	CAÑO LORO	MAGDALENA
MA3b	10.9667	-74.5167	CAÑO CLARÍN	MAGDALENA
MA3a	10.95	-74.4833	CAÑO CLARÍN	MAGDALENA
MA3d	10.9333	-74.2833	LOS MICOS	MAGDALENA
MA3c	10.8	-74.4667	LA BODEGA	MAGDALENA
MA3e	10.7833	-74.3667	PUNTA BLANCA	MAGDALENA
MA3f	10.75	-74.3794	MENGAJITO	MAGDALENA
BO1a	10.1667	-75.7833	LA ISLA ROSARIO	BOLIVAR
BO4a	10.1667	-75.5167	MATUNILLA	BOLIVAR
BO3a	10.1	-75.5667	ARROYO HONDO	BOLIVAR
BO3b	10.05	-75.5333	CIÉNAGA HONDA	BOLIVAR
SU1a	10	-75.5667	BOCA DE PABLO	SUCRE
SU1b	9.951	-75.576	BOCA MATUNA	SUCRE
SU2a	9.888	-75.613	LA ALEGRIA	SUCRE
BO2a	9.78333	-75.8167	LA ISLA TINTINPÁN	BOLIVAR
BO2b	9.76667	-75.7833	LA ISLA MANGLE	BOLIVAR
SU2b	9.58333	-75.5667	LA ALEGRIA	SUCRE
SU3a	9.55	-75.5667	EL FRANCES	SUCRE
SU3b	9.48333	-75.6	PALOBLANCO	SUCRE
CO2b	9.43333	-75.8333	CAÑO PALERMO	CORDOBA
CO2d	9.43333	-75.8333	CAÑO SALADO	CORDOBA
SU4b	9.43333	-75.6333	LA CAIMANERA	SUCRE
CO1a	9.41917	-75.7533	PLAYA BLANCA_PUNTA BOLIVAR	CORDOBA
SU4c	9.418	-75.617	LA CAIMANERA	SUCRE
CO2e	9.41667	-75.8833	CAÑO SALADO	CORDOBA
SU4a	9.4	-75.6333	LA CAIMANERA	SUCRE
CO2c	9.39806	-75.8594	CIÉNAGA NAVÍO	CORDOBA
CO2a	9.34944	-75.8575	CIÉNAGA SOLEDAD	CORDOBA
AN1a	8.53333	-76.9167	CIENAGA DE RIONEGRO	ANTIOQUIA
AN2f	8.16667	-76.9167	EL ROTO	ANTIOQUIA
AN2e	8.11667	-76.9333	BAHÍA CANDELARIA	ANTIOQUIA
AN2d	8.08333	-76.9333	BAHÍA CANDELARIA	ANTIOQUIA
AN2c	8.05	-76.85	BAHÍA PAILA	ANTIOQUIA
AN2a	8.03333	-76.9	MARIRRÍO	ANTIOQUIA
AN2b	8.03333	-76.8833	MARIRRÍO	ANTIOQUIA
CH3a	5.8405	-77.2692	NUQUÍ JURUBIRÁ	CHOCO
CH3b	5.78913	-77.2408	NUQUÍ TRIBUGÁ	CHOCO
CH3d	5.70809	-77.2644	NUQUÍ NUQUÍ	CHOCO
CH3c	5.61625	-77.3461	NUQUÍ COQUÍ	CHOCO
CH2a	5.39501	-77.4	BAJO BAUDÓ CUEVITA	CHOCO
CH2b	5.19702	-77.3694	BAJO BAUDÓ TERRÓN	CHOCO
CH2c	4.81485	-77.3299	BAJO BAUDÓ SIVIRÚ	CHOCO
CH1b	4.55887	-77.3202	LITORAL SAN JUAN VENADO-PLAYITA	CHOCO
CH1c	4.41821	-77.3522	LITORAL SAN JUAN PICHIMÁ	CHOCO
CH1a	4.29414	-77.4612	LITORAL SAN JUAN ISLA BODEGA	CHOCO
VC4a	3.81916	-77.1134	BUENAVENTURA PATEDÓ	VALLE DEL CAUCA
VC3b	3.76058	-77.1674	RAPOSO PUNTA SALADO	VALLE DEL CAUCA
VC3a	3.6496	-77.1503	RAPOSO CACAO-RAPOSO	VALLE DEL CAUCA
VC2a	3.51281	-77.2652	CAJAMBRE PUNTA BONITA	VALLE DEL CAUCA
VC1b	3.38449	-77.3664	NAYA ENCANTO-YARUMANGUI	VALLE DEL CAUCA
VC1a	3.36021	-77.4178	NAYA BOCA CHAMUSCADO	VALLE DEL CAUCA
CA3c	3.18778	-77.4787	LOPEZ DE MICAY ESTERO SAN FERNANDO	CAUCA
CA3b	3.05123	-77.6561	LÓPEZ DE MICAY ESTERO CANGREJAL	CAUCA
CA3a	2.97917	-77.668	LOPEZ DE MICAY PUNTA DEL COCO	CAUCA
CA2a	2.90173	-77.6977	TIMBIQUÍ SANTA BÁRBARA DEL MAR	CAUCA
CA2b	2.83232	-77.6922	TIMBIQUÍ BUBUEY-SECADERO	CAUCA
CA1b	2.68065	-77.8935	GUAPI BRAZO QUIROGA	CAUCA
CA1a	2.67556	-77.8089	GUAPI BOCANA GUAJUÍ	CAUCA
CA1d	2.64899	-77.9093	GUAPI R.GUAPI-PALACÉ	CAUCA
NA10a	2.64261	-78.0215	LA TOLA CUERVAL	NARIÑO
CA1c	2.62765	-77.8846	GUAPI R.GUAPI-RECODO	CAUCA
NA10b	2.59362	-78.0948	LA TOLA BOCA TAPAJE	NARIÑO
NA9a	2.50422	-78.5082	MOSQUERA TASQUILLA	NARIÑO
NA9c	2.43339	-78.4518	MOSQUERA ESTERO CORTADERAL	NARIÑO
NA8b	2.42762	-78.5814	SAN JUAN DE LA COSTA GUACHAL	NARIÑO
NA9b	2.42046	-78.4801	MOSQUERA ESTERO CORTADERAL	NARIÑO
NA8d	2.40422	-78.5804	SAN JUAN DE LA COSTA ESTERO CHILINGO	NARIÑO
NA8a	2.35109	-78.6148	SAN JUAN DE LA COSTA ESTERO EL NARANJO	NARIÑO
NA8c	2.2683	-78.6482	SAN JUAN DE LA COSTA ESTERO PASADERO	NARIÑO
NA7b	2.2167	-78.673	SALAHONDA ESTERO YEPES	NARIÑO
NA7a	2.17024	-78.7031	SALAHONDA EL BUJÍO	NARIÑO
NA7d	2.00832	-78.6223	SALAHONDA ESTERO SANTA BÁRBARA	NARIÑO
NA7c	1.90519	-78.5383	SALAHONDA ESTERO CURAY	NARIÑO
NA4d	1.81328	-78.8391	GUINULERO VAQUERÍA	NARIÑO
NA5a	1.80284	-78.8276	TUMACO SUR ESTERO TABACAL	NARIÑO
NA5c	1.77331	-78.8217	TUMACO SUR ESTERO DEL MEDIO	NARIÑO
NA4b	1.76875	-78.8907	GUINULERO BOCAGRANDE	NARIÑO
NA5b	1.76848	-78.8245	TUMACO SUR ESTERO LOS SÁBALOS	NARIÑO
NA4a	1.76503	-78.8868	GUINULERO PAPAYAL	NARIÑO
NA6a	1.74778	-78.715	TUMACO NORTE ESTERO CHAPILAR	NARIÑO
NA6b	1.74747	-78.7163	TUMACO NORTE ESTERO TRAVASÍA	NARIÑO
NA6d	1.74575	-78.7667	TUMACO NORTE ESTERO SAN LUIS	NARIÑO
NA6c	1.74522	-78.7667	TUMACO NORTE ESTERO BAGRERO	NARIÑO
NA5d	1.74317	-78.8127	TUMACO SUR TRES BOCAS-COBA	NARIÑO
NA4c	1.73461	-78.9122	GUINULERO ESTERO PURÚN	NARIÑO
NA3d	1.66389	-78.9958	CABO MANGLARES LAS MERCEDES	NARIÑO
NA3b	1.62744	-79.0001	CABO MANGLARES ESTERO SACAJO	NARIÑO
NA3c	1.61367	-78.9758	CABO MANGLARES BRAZO A B/NUEVA	NARIÑO
NA3a	1.59569	-78.9401	CABO MANGLARES BOCANUEVA	NARIÑO
NA2a	1.56475	-78.8956	CHONTAL ESTERO LA GLORIA	NARIÑO
NA2c	1.56444	-78.8686	CHONTAL E. CONGAL	NARIÑO
NA2b	1.54804	-78.8939	CHONTAL E. SANTO DOMINGO	NARIÑO
NA2d	1.52739	-78.8655	CHONTAL E. LA MERERA	NARIÑO
NA1a	1.48639	-78.8228	CANDELILLAS DEL MAR ESTERO MONGONES	NARIÑO
NA1b	1.48583	-78.7993	CANDELILLAS DEL MAR PUNTA DEL AVION	NARIÑO
NA1c	1.40889	-78.7682	CANDELILLAS DEL MAR SECTOR PUSBÍ	NARIÑO
SA1a	12.5657	-81.7044	Bahía Hooker-Km 27	SAN ANDRÉS
SA1b	12.5657	-81.7044	Bahía Hooker-Km 27	SAN ANDRÉS
SA1c	12.5657	-81.7044	Bahía Hooker-Km 27	SAN ANDRÉS
SA1d	12.5657	-81.7044	Bahía Hooker-Km 27	SAN ANDRÉS
SA2a	12.5261	-81.7274	El Cove	SAN ANDRÉS
SA3a	12.555	-81.7089	Mount Plesant-Km 25	SAN ANDRÉS
SA3b	12.5467	-81.7073	Mount Plesant-Km 23	SAN ANDRÉS
SA3c	12.5408	-81.7086	Salt Creek-Km 21	SAN ANDRÉS
SA4a	12.5241	-81.714	Sound Bay-Km 20	SAN ANDRÉS
SA4b	12.5241	-81.714	Sound Bay-Km 20	SAN ANDRÉS
SA4c	12.5033	-81.7187	Smith Channel-Km 18	SAN ANDRÉS

## Sheet: Original matrix
Coast	Location code	WGS 84 Coordinates		DEN (ind/0.1 ha.)					BAS. AREA					DBH (cm)					REL.FREQ					REL.DOM					REL.DEN					IVI
		Latitude N	Longitude W	A	L	R	P	C	A	L	R	P	C	A	L	R	P	C	A	L	R	P	C	A	L	R	P	C	A	L	R	P	C	A	L	R	P	C
P	NA1a	1.48639	78.8228			20.977		1.049			1.254		0.065			27.5888		28.0882			83.333		16.667			95.104		4.896			95.238		4.762			273.675		26.325
P	NA1b	1.48583	78.7993			14.955	1.068				0.732	0.206				24.9642	49.5568				85.714	14.286				78.063	21.937				93.333	6.667				257.111	42.889
P	NA1c	1.40889	78.7682			8.751	3.424				0.601	0.095				29.5708	18.7953				61.538	30.769				75.912	11.963				69.697	27.293				207.148	70.005
P	NA2a	1.56475	78.8956			14.154					0.747					25.9224					100					100					100					300
P	NA2b	1.54804	78.8939			18.551					1.128					27.8244					100					100					100					300
P	NA2c	1.56444	78.8686			15.369					0.773					25.3059					92.857					98.913					97.826					289.596
P	NA2d	1.52739	78.8655			26.12					1.938					30.7359					100					100					100					300
P	NA3a	1.59569	78.9401	0.377	1.506	15.44			0.046	0.087	1.069			39.4152	27.1208	29.6907			5.264	15.789	78.947			3.84	7.214	88.947			2.174	8.696	89.13			11.276	31.669	257.025
P	NA3b	1.62744	79.0001			10.1	3.367				0.636	0.225				28.3154	29.1692				41.176	11.765				29.814	10.559				30	10				100.99	32.324
P	NA3c	1.61367	78.9758	1.174		23.486	0.391		0.052		2.048	0.01		23.7478		33.3208	18.0454		9.524		80.952	4.762		2.433		92.109	0.452		4.615		92.308	1.538		16.573		269.369	6.752
P	NA3d	1.66389	78.9958	13.559	16.102	10.169			0.679	0.621	0.452			25.2509	22.1596	23.7895			37.931	34.483	27.586			38.757	35.436	25.807			34.03	40.426	25.532			110.731	110.344	78.925
P	NA4a	1.76503	78.8868			18.408		0.275			1.946		0.009			36.6879		20.4131			94.444		5.556			99.558		0.442			98.525		1.471			292.532		7.468
P	NA4b	1.76875	78.8907	0.667	0.89	7.786			0.039	0.03	0.516			27.285	20.7167	29.0484			7.143	14.286	78.571			6.609	5.11	88.281			7.143	9.524	83.333			20.895	28.92	250.186
P	NA4c	1.73461	78.9122			11.941					0.967					32.1106					100					100					100					100
P	NA4d	1.81328	78.8391	1.666		13.328			0.483		0.458			60.7563		20.9173			12.5		50			28.053		26.618			6.25		50			46.803		126.618
P	NA5a	1.80284	78.8276		1.799	8.273				0.116	0.358				28.6529	23.4728				23.077	76.923				24.5	75.5				17.857	82.143				65.434	234.566
P	NA5b	1.76848	78.8245			12.178	2.283				0.823	0.084				29.3337	21.6442				71.429	28.571				90.718	9.282				84.211	15.789				246.358	53.642
P	NA5c	1.77331	78.8217			10.278					0.735					30.1748					100					100					100					300
P	NA5d	1.74317	78.8127			14.017	4.947				1.346	0.142				34.9663	19.1174				40	26.667				48.679	5.149				53.125	18.75				141.804	50.566
P	NA6a	1.74778	78.715	0.629		18.87			0.047		0.91			30.8446		24.7793			10		90			4.58		95.042			3.226		96.774			18.183		281.817
P	NA6b	1.74747	78.7163			19.48					1.123					27.0926					87.5					95.656					96.426					279.584
P	NA6c	1.74522	78.7667		0.604	9.356				0.088	0.606				43.0703	28.7175				11.111	88.889				12.663	87.337				6.061	93.939				29.835	270.165
P	NA6d	1.74575	78.7667			10.848					0.536					25.082					71.429					72.521					78.378					222.328
P	NA7a	2.17024	78.7031	5.208	0.372	2.604	7.811		0.618	0.007	0.104	0.421		38.8699	15.4786	22.5502	26.1965		30	5	25	40		53.709	0.642	9.029	36.621		32.558	2.326	16.279	48.837		116.267	7.967	50.308	125.458
P	NA7b	2.2167	78.673			10.267					1.001					35.2331					40					31.935					36.111					108.046
P	NA7c	1.90519	78.5383			15.972					1.073					29.2466					100					100					100					300
P	NA7d	2.00832	78.6223	0.944		14.158			0.238		1.569			56.6575		37.5635			13.333		86.667			13.174		86.826			6.25		93.75			32.757		267.243
P	NA8a	2.35109	78.6148			28.468					1.593					26.6922					100					100					100					300
P	NA8b	2.42762	78.5814			27.901	0.715				2.007	0.047				30.2635	28.9302				73.333	6.667				93.005	2.19				88.636	2.273				254.975	11.129
P	NA8c	2.2683	78.6482			26.529	1.895				2.108	0.099				31.8075	25.791				52.381	4.762				72.277	3.378				63.636	4.545				188.294	12.686
P	NA8d	2.40422	78.5804	2.261		6.784			0.296		1.1			40.8273		45.4369			6.667		40			10.078		37.451			10		30			26.744		107.451
P	NA9a	2.50422	78.5082			15.982					0.72					23.95					100					100					100					300
P	NA9b	2.42046	78.4801			12.559					1.374					37.3225					87.5					99.27					96.154					282.924
P	NA9c	2.43339	78.4518			11.774					1.924					45.6137					69.231					92.991					80					242.222
P	NA10a	2.64261	78.0215			36.439					2.145					27.377					100					100					100					300
P	NA10b	2.59362	78.0948			35.086					2.115					27.7041					70					80.787					78.125					228.912
P	CA1a	2.67556	77.8089			23.154	8.42				1.226	0.688				25.9649	32.2547				40	25				46.469	26.084				56.41	20.513				142.879	71.597
P	CA1b	2.68065	77.8935			31.326					1.882					27.6575					100					100					100					300
P	CA1c	2.62765	77.8846	7.481		0.499			1.039		0.019			42.0516		22.0182			31.579		5.263			35.949		0.65			37.5		2.5			105.028		8.413
P	CA1d	2.64899	77.9093			15.52	0.501				1.808	0.017				38.5131	20.7855				66.667	6.667				75.781	0.713				81.579	2.632				224.026	10.011
P	CA2a	2.90173	77.6977	2.873		25.855			0.318		2.08			37.5406		32.0048			23.077		76.923			13.249		86.751			10		90			46.326		253.674
P	CA2b	2.83232	77.6922			6.49	8.653				1.037	0.217				45.1047	17.8691				16.667	8.333				26.086	5.457				12	16				54.752	29.791
P	CA3a	2.97917	77.668			38.613					3.148					32.2185					90.909					99.316					97.5					287.725
P	CA3b	3.05123	77.6561			40.849	2.476				3.231	0.053				31.7346	16.5089				71.429	7.143				92.264	1.511				84.615	5.128				248.308	13.783
P	CA3c	3.18778	77.4787			28.554					3.293					38.3193					58.824					76.293					75					210.116
P	VC1a	3.36021	77.4178			19.68	2.187				1.402	0.076				30.1173	21.0348				76.923	23.077				94.871	5.129				90	10				261.794	38.206
P	VC1b	3.38449	77.3664			13.196	4.658				1.197	0.188				33.9845	22.6691				41.667	16.667				38.477	6.054				42.5	15				122.644	37.72
P	VC2a	3.51281	77.2652		0.934	24.292	4.672			0.026	1.264	0.122			18.8264	25.7393	18.2341			6.677	60	13.333			1.619	77.27	7.482			2.703	70.27	13.514			10.988	207.54	34.329
P	VC3a	3.6496	77.1503			18.505	4.048				0.985	0.115				26.0333	19.0188				60	33.337				87.699	10.255				80	17.5				227.699	61.88
P	VC3b	3.76058	77.1674			21					1.06					25.3512					62.5					71.668					77.5					211.668
P	VC4a	3.81916	77.1134			18.348	1.359				0.777	0.027				23.2205	15.9048				61.538	15.385				85.741	3.021				84.375	6.25				231.655	24.655
P	CH1a	4.29414	77.4612			19.556	1.449				2.107	0.044				37.038	19.6629				52.632	10.526				70.662	1.471				67.5	5				190.793	16.998
P	CH1b	4.55888	77.3202			18.728					0.799					23.3068					66.667					73.197					77.778					217.641
P	CH1c	4.41821	77.3522			21.024					0.913					23.5143					91.667					97.113					97.436					286.215
P	CH2a	5.39501	77.4			14.782					1.583					36.9257					100					100					100					300
P	CH2b	5.19702	77.3694	1.219		9.755	9.755		1.085		0.646	0.341		106.455		29.0374	21.0969		5.882		41.176	41.176		7.408		56.393	29.76		5.556		44.444	44.444		18.846		142.014	115.381
P	CH2c	4.81485	77.3299	0.666		23.324			0.018		1.243			18.5504		26.0489			6.667		66.667			1.341		93.045			2.5		87.5			10.507		247.211
P	CH3a	5.8405	77.2692	7.195		14.389			0.508		0.876			29.9828		27.8414			27.273		63.636			36.778		58.195			32.353		64.706			93.404		189.537
P	CH3b	5.78913	77.2408			29.008					1.324					24.1068					100					100					100					300
P	CH3c	5.61625	77.3461			11.149					1.525					41.7323					77.778					93.23					86.667					257.674
P	CH3d	5.70809	77.2644	2.222		8.889			0.111		0.324			25.22		21.5427			7.692		53.846			16.71		48.592			12.5		50			36.906		152.438
CC	AN1a	8.53333	76.9167		1.6	33.6				0.14	2.13				33	28.2				3.7	55.6				5.4	84.8				1.5	31.4				10.6	171.8
CC	AN2a	8.01667	76.9167			40					2.57					27.1					70					94.8					54.8					219.6
CC	AN2b	8.01667	76.9167	1.1		17.3			0.22		1.11			51.6		27.6			4.3		51.2			15.1		74			3.2		51.6			22.6		177.7
CC	AN2c	8.06667	76.85		4.7	25.5				0.1	0.63				22.2	23				23.8	38.1				11.7	74.8				6	32.6				41.6	145.6
CC	AN2d	8.1	76.9333		1.3	23.2				0.09	1.59				30	27.7				5	70				5.1	89.6				3.8	69.2				14	222.8
CC	AN2e	8.11667	76.9333			44.3					2.52					22					79.3					99.8					83.7					262.7
CC	AN2f	8.18333	76.9333		6.5	16.6				0.26	0.68				29.2	30.7				22.7	31.8				24.4	63.6				8.4	21.5				55.5	116.9
CC	CO1a	9.41667	75.75	13.3	0.9	10.7			0.8	1.29	0.43			26.1	10	22			20.4	2	20.4			45.5	0	24.5			16.9	1.1	13.5			82.7	4.4	58.3
CC	CO2a	9.33333	75.8667			35.5					1.53					22.5					53.8					83					52.1					189
CC	CO2b	9.43333	75.8333		3.6	34.5				0.29	1.81				31.7	25.2				3.2	48.4				12.5	78.6				3.9	37.3				19.6	164.2
CC	CO2c	9.4	75.85	2.9		20			0.18		0.88			28.3		23.2			5		30			12.2		59.2			1.7		11.7			18.9		100.9
CC	CO2d	9.41667	75.8667	5.3	2.7	27.6			0.1	0.35	1.31			19.5	21.3	21.5			9.2	3.1	33.8			9.2	3.1	33.8			3.2	1.7	17.5			21.9	7.8	85.2
CC	CO2e	9.41667	75.8833	6.4	4.1	10.5		1.7	0.6	0.36	0.77		0.07	30.1	32.6	30		22.4	12.8	10.3	20.5		2.6	30.9	18.4	39.5		3.6	11.3	7.2	18.5		3.1	55	35.9	78.6		9.3
CC	SU1a	9.951	75.576	6.4	2.6	6.4			0.18	0.15	0.23			18.3	26	20.8			18.2	9.1	18.2			17.5	14.3	22.9			5.8	2.4	5.8			41.6	25.8	46.8
CC	SU1b	9.96667	75.9	6.9	1	11.9			0.34	0.02	0.59			24.3	17.9	24			29.4	5.9	29.4			21.4	1.6	37.2			6.1	0.9	10.4			57	8.3	77.1
CC	SU2a	9.58333	75.5667			38.5					3.66					35.1					59.1					97.8					54.2					211.1
CC	SU2b	9.58333	75.5667			0.8					0.04					25					1.3					5.5					0.5					7.3
CC	SU3a	9.55	75.5667			33.5					1.66					22.4					23.5					79					25.4					127.9
CC	SU3b	9.46667	75.6	4.2	8.4				0.12	0.2				18.4	16.9				6.7	13.3				6.7	12.1				1.3	2.5				15.1	28
CC	SU4a	9.41667	75.6167			7					0.15					16.4					13.6					6.8					4.2					24.6
CC	SU4b	9.4	75.6333	9.3	3.7	31.6			0.3	0.1	1.01			20	17.2	22.1			7.8	4.5	21.2			14.7	4.7	49.5			7.3	2.9	24.8			29.6	12.2	95.6
CC	SU4c	9.43333	75.6333	4.9	4.1	21.1			0.13	0.13	0.53			17.9	19.8	17.8			12.1	9.1	30.3			10.8	11.2	45.6			5.3	4.5	23.1			28.2	24.7	99.1
CC	BO1a	10.1667	75.7833			35.5					1.11					19.5					50					21.8					28.4					100.3
CC	BO2a	9.78333	75.8167			27.3					1.55					23.1					52.8					83.4					48.1					184.3
CC	BO2b	9.76667	75.7833		5.6	14				0.46	0.74				27	25.2				15.4	30.8				29.5	47.5				6.9	17.2				51.8	95.5
CC	BO3a	10.1167	75.5667		4.4	13.2				0.21	0.72				23.3	25.1				17.2	31				16.4	56.8				5.1	15.2				38.8	103
CC	BO3b	10.0667	75.5333		2.9	9.4				0.1	0.37				20.2	21.6				17.9	28.6				3.8	35.9				3.3	10.8				25	53.6
CC	BO4a	10.1667	75.5333	12.2	9.2	7.6			0.49	0.54	0.24			22.1	26.7	19.9			21.1	15.8	10.5			15.3	16.9	7.6			12.9	9.6	8			49.2	42.3	26.2
CC	MA1a	11.3167	74.1333	7.1		16.5			0.26		0.38			21.6		17			20.8		25			24.7		35.7			9.5		22			54.9		82.8
CC	MA1b	11.3333	74.05		26.8	13.4				2.49	1.89				30.2	38.6				31.2	18.8				55.4	42.2				47	23				133.6	84.5
CC	MA2a	11.05	74.75	13		17.6			0.46		0.79			20.2		23.2			25.6		27.9			27.7		47.6			15.8		21.3			69.1		96.8
CC	MA3a	10.9667	74.5	17.3	1.7	10.4			0.79	0.05	0.61			22.9	18.3	26.2			25	6.8	15.9			41.8	2.5	32.5			17.1	1.7	10.3			84	11	58.7
CC	MA3b	10.9667	74.5167	33.9	2.3				0.83	0.06				17.5	17.7				30.9	7.8				40.2	2.7				14.2	0.9				84.9	11.3
CC	MA3c	10.8	74.4667	37.4		1.8			1.79		0.12			23.3		27			48.5		3			78.6		5.4			42.6		2.1			169.7		10.5
CC	MA3d	10.9333	74.3	14.3	0.8	4.2			1.07	0.02	0.23			29.3	19.2	26.1			33.3	6.7	13.3			66.6	1.5	14.3			19.6	1.2	5.8			119.6	9.3	33.4
CC	MA3e	10.7833	74.3667	10.7		1			2.87		0.06			53.7		27			33.3		11.1			94.6		1.8			40.9		3.7			168.8		16.7
CC	MA3f	10.75	74.3833	11.2	3.4	1.3			2.01	0.11	0.07			42.1	19.9	22.4			27.9	16.3	9.3			77.5	4.2	2.8			30	9.2	4.3			135.8	29.7	16.7
CC	GU1a	11.9167	71.2833	44					1.05					17.4					20					63					28					111
CC	GU2a	12.2333	71.8667	21	11				0.68	0.48				20.3	24				11.1	11.1				36.2	25.2				1.1	6.1				59.8	42.4
CC	GU3a	11.3333	73.2		41.4	7.3				1.71	0.21				22.24	18.96				26	16				57	7.1				45	8				129.1	30.9
CC	GU4a	11.2667	73.3167		31.9			3.4		1.33			0.08		21.3			13.3		33.3			11.1		64.2			3.9		28.4			2.9		125.9			17.9
OC	SA1a	12.5657	81.7044	68.6	23.52	5.88			1.596	0.5472	0.1368			10.99	3.768	0.942			53	36	11			66	30	4			70	24	6			189	90	21
OC	SA1b	12.5657	81.7044	70	70	60			1.61	1.61	1.794			5.46	5.46	4.68			31	41	28			20	30	50			35	35	30			86	106	108
OC	SA1c	12.5657	81.7044	100.98	29.92	56.1			4.32	1.28	2.4			10.422	3.088	5.79			42	22	36			52	21	27			54	16	30			148	59	93
OC	SA1d	12.5657	81.7044	14.88	19.53	58.59			0.9232	1.2117	3.6351			3.84	5.04	15.12			23	26	51			37	37	26			16	21	63			76	84	141
OC	SA2a	12.5261	81.7274			85					5.1					24.11					100					100					100					300
OC	SA3a	12.555	81.7089		11.2	28.8				4.6032	11.8368				17.2172	44.2728				39	61				20	80				28	72				76	213
OC	SA3b	12.5467	81.7073	36	63	1			3.0276	5.2983	0.0841			9.936	17.388	0.276			37	60	3			18	82	0.4			36	63	1			91	205	5
OC	SA3c	12.5408	81.7086		0.48	7.52				0.1932	3.0268				4.272	66.928				20	80				11	89				6	94				37	263
OC	SA4a	12.5241	81.714	29.16	35.64	16.2			1.2132	1.4828	0.674			7.4016	9.0464	4.112			32	45	24			41	46	13			36	44	20			109	135	57
OC	SA4b	12.5241	81.714	13.65	1.26	6.09			2.691	0.2484	1.2006			25.935	2.394	11.571			51	13	36			79	7	14			65	6	29			195	26	79
OC	SA4c	12.5033	81.7187		7.44	16.56				1.3268	2.9532				14.384	32.016				43	57				50	50				31	69				124	176

## Sheet: Ordination matrix
Coast	Code	LAT	LON	DEN-A	DEN-L	DEN-R	DEN-P	DEN-C	BASA-A	BASA-L	BASA-R	BASA-P	BASA-C	DBH-A	DBH-L	DBH-R	DBH-P	DBH-C	FREQ-A	FREQ-L	FREQ-R	FREQ-P	FREQ-C	DOM-A	DOM-L	DOM-R	DOM-P	DOM-C	DENREL-A	DENREL-L	DENREL-R	DENREL-P	DENREL-C	IVI-A	IVI-L	IVI-R	IVI-P	IVI-C
P	NA1a	1.48639	-78.8228	0	0	20.977	0	1.049	0	0	1.254	0	0.065	0	0	27.5888	0	28.0882	0	0	83.333	0	16.667	0	0	95.104	0	4.896	0	0	95.238	0	4.762	0	0	273.675	0	26.325
P	NA1b	1.48583	-78.7993	0	0	14.955	1.068	0	0	0	0.732	0.206	0	0	0	24.9642	49.5568	0	0	0	85.714	14.286	0	0	0	78.063	21.937	0	0	0	93.333	6.667	0	0	0	257.111	42.889	0
P	NA1c	1.40889	-78.7682	0	0	8.751	3.424	0	0	0	0.601	0.095	0	0	0	29.5708	18.7953	0	0	0	61.538	30.769	0	0	0	75.912	11.963	0	0	0	69.697	27.293	0	0	0	207.148	70.005	0
P	NA2a	1.56475	-78.8956	0	0	14.154	0	0	0	0	0.747	0	0	0	0	25.9224	0	0	0	0	100	0	0	0	0	100	0	0	0	0	100	0	0	0	0	300	0	0
P	NA2b	1.54804	-78.8939	0	0	18.551	0	0	0	0	1.128	0	0	0	0	27.8244	0	0	0	0	100	0	0	0	0	100	0	0	0	0	100	0	0	0	0	300	0	0
P	NA2c	1.56444	-78.8686	0	0	15.369	0	0	0	0	0.773	0	0	0	0	25.3059	0	0	0	0	92.857	0	0	0	0	98.913	0	0	0	0	97.826	0	0	0	0	289.596	0	0
P	NA2d	1.52739	-78.8655	0	0	26.12	0	0	0	0	1.938	0	0	0	0	30.7359	0	0	0	0	100	0	0	0	0	100	0	0	0	0	100	0	0	0	0	300	0	0
P	NA3a	1.59569	-78.9401	0.377	1.506	15.44	0	0	0.046	0.087	1.069	0	0	39.4152	27.1208	29.6907	0	0	5.264	15.789	78.947	0	0	3.84	7.214	88.947	0	0	2.174	8.696	89.13	0	0	11.276	31.669	257.025	0	0
P	NA3b	1.62744	-79.0001	0	0	10.1	3.367	0	0	0	0.636	0.225	0	0	0	28.3154	29.1692	0	0	0	41.176	11.765	0	0	0	29.814	10.559	0	0	0	30	10	0	0	0	100.99	32.324	0
P	NA3c	1.61367	-78.9758	1.174	0	23.486	0.391	0	0.052	0	2.048	0.01	0	23.7478	0	33.3208	18.0454	0	9.524	0	80.952	4.762	0	2.433	0	92.109	0.452	0	4.615	0	92.308	1.538	0	16.573	0	269.369	6.752	0
P	NA3d	1.66389	-78.9958	13.559	16.102	10.169	0	0	0.679	0.621	0.452	0	0	25.2509	22.1596	23.7895	0	0	37.931	34.483	27.586	0	0	38.757	35.436	25.807	0	0	34.03	40.426	25.532	0	0	110.731	110.344	78.925	0	0
P	NA4a	1.76503	-78.8868	0	0	18.408	0	0.275	0	0	1.946	0	0.009	0	0	36.6879	0	20.4131	0	0	94.444	0	5.556	0	0	99.558	0	0.442	0	0	98.525	0	1.471	0	0	292.532	0	7.468
P	NA4b	1.76875	-78.8907	0.667	0.89	7.786	0	0	0.039	0.03	0.516	0	0	27.285	20.7167	29.0484	0	0	7.143	14.286	78.571	0	0	6.609	5.11	88.281	0	0	7.143	9.524	83.333	0	0	20.895	28.92	250.186	0	0
P	NA4c	1.73461	-78.9122	0	0	11.941	0	0	0	0	0.967	0	0	0	0	32.1106	0	0	0	0	100	0	0	0	0	100	0	0	0	0	100	0	0	0	0	100	0	0
P	NA4d	1.81328	-78.8391	1.666	0	13.328	0	0	0.483	0	0.458	0	0	60.7563	0	20.9173	0	0	12.5	0	50	0	0	28.053	0	26.618	0	0	6.25	0	50	0	0	46.803	0	126.618	0	0
P	NA5a	1.80284	-78.8276	0	1.799	8.273	0	0	0	0.116	0.358	0	0	0	28.6529	23.4728	0	0	0	23.077	76.923	0	0	0	24.5	75.5	0	0	0	17.857	82.143	0	0	0	65.434	234.566	0	0
P	NA5b	1.76848	-78.8245	0	0	12.178	2.283	0	0	0	0.823	0.084	0	0	0	29.3337	21.6442	0	0	0	71.429	28.571	0	0	0	90.718	9.282	0	0	0	84.211	15.789	0	0	0	246.358	53.642	0
P	NA5c	1.77331	-78.8217	0	0	10.278	0	0	0	0	0.735	0	0	0	0	30.1748	0	0	0	0	100	0	0	0	0	100	0	0	0	0	100	0	0	0	0	300	0	0
P	NA5d	1.74317	-78.8127	0	0	14.017	4.947	0	0	0	1.346	0.142	0	0	0	34.9663	19.1174	0	0	0	40	26.667	0	0	0	48.679	5.149	0	0	0	53.125	18.75	0	0	0	141.804	50.566	0
P	NA6a	1.74778	-78.715	0.629	0	18.87	0	0	0.047	0	0.91	0	0	30.8446	0	24.7793	0	0	10	0	90	0	0	4.58	0	95.042	0	0	3.226	0	96.774	0	0	18.183	0	281.817	0	0
P	NA6b	1.74747	-78.7163	0	0	19.48	0	0	0	0	1.123	0	0	0	0	27.0926	0	0	0	0	87.5	0	0	0	0	95.656	0	0	0	0	96.426	0	0	0	0	279.584	0	0
P	NA6c	1.74522	-78.7667	0	0.604	9.356	0	0	0	0.088	0.606	0	0	0	43.0703	28.7175	0	0	0	11.111	88.889	0	0	0	12.663	87.337	0	0	0	6.061	93.939	0	0	0	29.835	270.165	0	0
P	NA6d	1.74575	-78.7667	0	0	10.848	0	0	0	0	0.536	0	0	0	0	25.082	0	0	0	0	71.429	0	0	0	0	72.521	0	0	0	0	78.378	0	0	0	0	222.328	0	0
P	NA7a	2.17024	-78.7031	5.208	0.372	2.604	7.811	0	0.618	0.007	0.104	0.421	0	38.8699	15.4786	22.5502	26.1965	0	30	5	25	40	0	53.709	0.642	9.029	36.621	0	32.558	2.326	16.279	48.837	0	116.267	7.967	50.308	125.458	0
P	NA7b	2.2167	-78.673	0	0	10.267	0	0	0	0	1.001	0	0	0	0	35.2331	0	0	0	0	40	0	0	0	0	31.935	0	0	0	0	36.111	0	0	0	0	108.046	0	0
P	NA7c	1.90519	-78.5383	0	0	15.972	0	0	0	0	1.073	0	0	0	0	29.2466	0	0	0	0	100	0	0	0	0	100	0	0	0	0	100	0	0	0	0	300	0	0
P	NA7d	2.00832	-78.6223	0.944	0	14.158	0	0	0.238	0	1.569	0	0	56.6575	0	37.5635	0	0	13.333	0	86.667	0	0	13.174	0	86.826	0	0	6.25	0	93.75	0	0	32.757	0	267.243	0	0
P	NA8a	2.35109	-78.6148	0	0	28.468	0	0	0	0	1.593	0	0	0	0	26.6922	0	0	0	0	100	0	0	0	0	100	0	0	0	0	100	0	0	0	0	300	0	0
P	NA8b	2.42762	-78.5814	0	0	27.901	0.715	0	0	0	2.007	0.047	0	0	0	30.2635	28.9302	0	0	0	73.333	6.667	0	0	0	93.005	2.19	0	0	0	88.636	2.273	0	0	0	254.975	11.129	0
P	NA8c	2.2683	-78.6482	0	0	26.529	1.895	0	0	0	2.108	0.099	0	0	0	31.8075	25.791	0	0	0	52.381	4.762	0	0	0	72.277	3.378	0	0	0	63.636	4.545	0	0	0	188.294	12.686	0
P	NA8d	2.40422	-78.5804	2.261	0	6.784	0	0	0.296	0	1.1	0	0	40.8273	0	45.4369	0	0	6.667	0	40	0	0	10.078	0	37.451	0	0	10	0	30	0	0	26.744	0	107.451	0	0
P	NA9a	2.50422	-78.5082	0	0	15.982	0	0	0	0	0.72	0	0	0	0	23.95	0	0	0	0	100	0	0	0	0	100	0	0	0	0	100	0	0	0	0	300	0	0
P	NA9b	2.42046	-78.4801	0	0	12.559	0	0	0	0	1.374	0	0	0	0	37.3225	0	0	0	0	87.5	0	0	0	0	99.27	0	0	0	0	96.154	0	0	0	0	282.924	0	0
P	NA9c	2.43339	-78.4518	0	0	11.774	0	0	0	0	1.924	0	0	0	0	45.6137	0	0	0	0	69.231	0	0	0	0	92.991	0	0	0	0	80	0	0	0	0	242.222	0	0
P	NA10a	2.64261	-78.0215	0	0	36.439	0	0	0	0	2.145	0	0	0	0	27.377	0	0	0	0	100	0	0	0	0	100	0	0	0	0	100	0	0	0	0	300	0	0
P	NA10b	2.59362	-78.0948	0	0	35.086	0	0	0	0	2.115	0	0	0	0	27.7041	0	0	0	0	70	0	0	0	0	80.787	0	0	0	0	78.125	0	0	0	0	228.912	0	0
P	CA1a	2.67556	-77.8089	0	0	23.154	8.42	0	0	0	1.226	0.688	0	0	0	25.9649	32.2547	0	0	0	40	25	0	0	0	46.469	26.084	0	0	0	56.41	20.513	0	0	0	142.879	71.597	0
P	CA1b	2.68065	-77.8935	0	0	31.326	0	0	0	0	1.882	0	0	0	0	27.6575	0	0	0	0	100	0	0	0	0	100	0	0	0	0	100	0	0	0	0	300	0	0
P	CA1c	2.62765	-77.8846	7.481	0	0.499	0	0	1.039	0	0.019	0	0	42.0516	0	22.0182	0	0	31.579	0	5.263	0	0	35.949	0	0.65	0	0	37.5	0	2.5	0	0	105.028	0	8.413	0	0
P	CA1d	2.64899	-77.9093	0	0	15.52	0.501	0	0	0	1.808	0.017	0	0	0	38.5131	20.7855	0	0	0	66.667	6.667	0	0	0	75.781	0.713	0	0	0	81.579	2.632	0	0	0	224.026	10.011	0
P	CA2a	2.90173	-77.6977	2.873	0	25.855	0	0	0.318	0	2.08	0	0	37.5406	0	32.0048	0	0	23.077	0	76.923	0	0	13.249	0	86.751	0	0	10	0	90	0	0	46.326	0	253.674	0	0
P	CA2b	2.83232	-77.6922	0	0	6.49	8.653	0	0	0	1.037	0.217	0	0	0	45.1047	17.8691	0	0	0	16.667	8.333	0	0	0	26.086	5.457	0	0	0	12	16	0	0	0	54.752	29.791	0
P	CA3a	2.97917	-77.668	0	0	38.613	0	0	0	0	3.148	0	0	0	0	32.2185	0	0	0	0	90.909	0	0	0	0	99.316	0	0	0	0	97.5	0	0	0	0	287.725	0	0
P	CA3b	3.05123	-77.6561	0	0	40.849	2.476	0	0	0	3.231	0.053	0	0	0	31.7346	16.5089	0	0	0	71.429	7.143	0	0	0	92.264	1.511	0	0	0	84.615	5.128	0	0	0	248.308	13.783	0
P	CA3c	3.18778	-77.4787	0	0	28.554	0	0	0	0	3.293	0	0	0	0	38.3193	0	0	0	0	58.824	0	0	0	0	76.293	0	0	0	0	75	0	0	0	0	210.116	0	0
P	VC1a	3.36021	-77.4178	0	0	19.68	2.187	0	0	0	1.402	0.076	0	0	0	30.1173	21.0348	0	0	0	76.923	23.077	0	0	0	94.871	5.129	0	0	0	90	10	0	0	0	261.794	38.206	0
P	VC1b	3.38449	-77.3664	0	0	13.196	4.658	0	0	0	1.197	0.188	0	0	0	33.9845	22.6691	0	0	0	41.667	16.667	0	0	0	38.477	6.054	0	0	0	42.5	15	0	0	0	122.644	37.72	0
P	VC2a	3.51281	-77.2652	0	0.934	24.292	4.672	0	0	0.026	1.264	0.122	0	0	18.8264	25.7393	18.2341	0	0	6.677	60	13.333	0	0	1.619	77.27	7.482	0	0	2.703	70.27	13.514	0	0	10.988	207.54	34.329	0
P	VC3a	3.6496	-77.1503	0	0	18.505	4.048	0	0	0	0.985	0.115	0	0	0	26.0333	19.0188	0	0	0	60	33.337	0	0	0	87.699	10.255	0	0	0	80	17.5	0	0	0	227.699	61.88	0
P	VC3b	3.76058	-77.1674	0	0	21	0	0	0	0	1.06	0	0	0	0	25.3512	0	0	0	0	62.5	0	0	0	0	71.668	0	0	0	0	77.5	0	0	0	0	211.668	0	0
P	VC4a	3.81916	-77.1134	0	0	18.348	1.359	0	0	0	0.777	0.027	0	0	0	23.2205	15.9048	0	0	0	61.538	15.385	0	0	0	85.741	3.021	0	0	0	84.375	6.25	0	0	0	231.655	24.655	0
P	CH1a	4.29414	-77.4612	0	0	19.556	1.449	0	0	0	2.107	0.044	0	0	0	37.038	19.6629	0	0	0	52.632	10.526	0	0	0	70.662	1.471	0	0	0	67.5	5	0	0	0	190.793	16.998	0
P	CH1b	4.55888	-77.3202	0	0	18.728	0	0	0	0	0.799	0	0	0	0	23.3068	0	0	0	0	66.667	0	0	0	0	73.197	0	0	0	0	77.778	0	0	0	0	217.641	0	0
P	CH1c	4.41821	-77.3522	0	0	21.024	0	0	0	0	0.913	0	0	0	0	23.5143	0	0	0	0	91.667	0	0	0	0	97.113	0	0	0	0	97.436	0	0	0	0	286.215	0	0
P	CH2a	5.39501	-77.4	0	0	14.782	0	0	0	0	1.583	0	0	0	0	36.9257	0	0	0	0	100	0	0	0	0	100	0	0	0	0	100	0	0	0	0	300	0	0
P	CH2b	5.19702	-77.3694	1.219	0	9.755	9.755	0	1.085	0	0.646	0.341	0	106.455	0	29.0374	21.0969	0	5.882	0	41.176	41.176	0	7.408	0	56.393	29.76	0	5.556	0	44.444	44.444	0	18.846	0	142.014	115.381	0
P	CH2c	4.81485	-77.3299	0.666	0	23.324	0	0	0.018	0	1.243	0	0	18.5504	0	26.0489	0	0	6.667	0	66.667	0	0	1.341	0	93.045	0	0	2.5	0	87.5	0	0	10.507	0	247.211	0	0
P	CH3a	5.8405	-77.2692	7.195	0	14.389	0	0	0.508	0	0.876	0	0	29.9828	0	27.8414	0	0	27.273	0	63.636	0	0	36.778	0	58.195	0	0	32.353	0	64.706	0	0	93.404	0	189.537	0	0
P	CH3b	5.78913	-77.2408	0	0	29.008	0	0	0	0	1.324	0	0	0	0	24.1068	0	0	0	0	100	0	0	0	0	100	0	0	0	0	100	0	0	0	0	300	0	0
P	CH3c	5.61625	-77.3461	0	0	11.149	0	0	0	0	1.525	0	0	0	0	41.7323	0	0	0	0	77.778	0	0	0	0	93.23	0	0	0	0	86.667	0	0	0	0	257.674	0	0
P	CH3d	5.70809	-77.2644	2.222	0	8.889	0	0	0.111	0	0.324	0	0	25.22	0	21.5427	0	0	7.692	0	53.846	0	0	16.71	0	48.592	0	0	12.5	0	50	0	0	36.906	0	152.438	0	0
CC	AN1a	8.53333	-76.9167	0	1.6	33.6	0	0	0	0.14	2.13	0	0	0	33	28.2	0	0	0	3.7	55.6	0	0	0	5.4	84.8	0	0	0	1.5	31.4	0	0	0	10.6	171.8	0	0
CC	AN2a	8.01667	-76.9167	0	0	40	0	0	0	0	2.57	0	0	0	0	27.1	0	0	0	0	70	0	0	0	0	94.8	0	0	0	0	54.8	0	0	0	0	219.6	0	0
CC	AN2b	8.01667	-76.9167	1.1	0	17.3	0	0	0.22	0	1.11	0	0	51.6	0	27.6	0	0	4.3	0	51.2	0	0	15.1	0	74	0	0	3.2	0	51.6	0	0	22.6	0	177.7	0	0
CC	AN2c	8.06667	-76.85	0	4.7	25.5	0	0	0	0.1	0.63	0	0	0	22.2	23	0	0	0	23.8	38.1	0	0	0	11.7	74.8	0	0	0	6	32.6	0	0	0	41.6	145.6	0	0
CC	AN2d	8.1	-76.9333	0	1.3	23.2	0	0	0	0.09	1.59	0	0	0	30	27.7	0	0	0	5	70	0	0	0	5.1	89.6	0	0	0	3.8	69.2	0	0	0	14	222.8	0	0
CC	AN2e	8.11667	-76.9333	0	0	44.3	0	0	0	0	2.52	0	0	0	0	22	0	0	0	0	79.3	0	0	0	0	99.8	0	0	0	0	83.7	0	0	0	0	262.7	0	0
CC	AN2f	8.18333	-76.9333	0	6.5	16.6	0	0	0	0.26	0.68	0	0	0	29.2	30.7	0	0	0	22.7	31.8	0	0	0	24.4	63.6	0	0	0	8.4	21.5	0	0	0	55.5	116.9	0	0
CC	CO1a	9.41667	-75.75	13.3	0.9	10.7	0	0	0.8	1.29	0.43	0	0	26.1	10	22	0	0	20.4	2	20.4	0	0	45.5	0	24.5	0	0	16.9	1.1	13.5	0	0	82.7	4.4	58.3	0	0
CC	CO2a	9.33333	-75.8667	0	0	35.5	0	0	0	0	1.53	0	0	0	0	22.5	0	0	0	0	53.8	0	0	0	0	83	0	0	0	0	52.1	0	0	0	0	189	0	0
CC	CO2b	9.43333	-75.8333	0	3.6	34.5	0	0	0	0.29	1.81	0	0	0	31.7	25.2	0	0	0	3.2	48.4	0	0	0	12.5	78.6	0	0	0	3.9	37.3	0	0	0	19.6	164.2	0	0
CC	CO2c	9.4	-75.85	2.9	0	20	0	0	0.18	0	0.88	0	0	28.3	0	23.2	0	0	5	0	30	0	0	12.2	0	59.2	0	0	1.7	0	11.7	0	0	18.9	0	100.9	0	0
CC	CO2d	9.41667	-75.8667	5.3	2.7	27.6	0	0	0.1	0.35	1.31	0	0	19.5	21.3	21.5	0	0	9.2	3.1	33.8	0	0	9.2	3.1	33.8	0	0	3.2	1.7	17.5	0	0	21.9	7.8	85.2	0	0
CC	CO2e	9.41667	-75.8833	6.4	4.1	10.5	0	1.7	0.6	0.36	0.77	0	0.07	30.1	32.6	30	0	22.4	12.8	10.3	20.5	0	2.6	30.9	18.4	39.5	0	3.6	11.3	7.2	18.5	0	3.1	55	35.9	78.6	0	9.3
CC	SU1a	9.46667	-75.6	6.4	2.6	6.4	0	0	0.18	0.15	0.23	0	0	18.3	26	20.8	0	0	18.2	9.1	18.2	0	0	17.5	14.3	22.9	0	0	5.8	2.4	5.8	0	0	41.6	25.8	46.8	0	0
CC	SU1b	9.951	-75.576	6.9	1	11.9	0	0	0.34	0.02	0.59	0	0	24.3	17.9	24	0	0	29.4	5.9	29.4	0	0	21.4	1.6	37.2	0	0	6.1	0.9	10.4	0	0	57	8.3	77.1	0	0
CC	SU2a	9.58333	-75.5667	0	0	38.5	0	0	0	0	3.66	0	0	0	0	35.1	0	0	0	0	59.1	0	0	0	0	97.8	0	0	0	0	54.2	0	0	0	0	211.1	0	0
CC	SU2b	9.58333	-75.5667	0	0	0.8	0	0	0	0	0.04	0	0	0	0	25	0	0	0	0	1.3	0	0	0	0	5.5	0	0	0	0	0.5	0	0	0	0	7.3	0	0
CC	SU3a	9.55	-75.5667	0	0	33.5	0	0	0	0	1.66	0	0	0	0	22.4	0	0	0	0	23.5	0	0	0	0	79	0	0	0	0	25.4	0	0	0	0	127.9	0	0
CC	SU3b	9.46667	-75.6	4.2	8.4	0	0	0	0.12	0.2	0	0	0	18.4	16.9	0	0	0	6.7	13.3	0	0	0	6.7	12.1	0	0	0	1.3	2.5	0	0	0	15.1	28	0	0	0
CC	SU4a	9.41667	-75.6167	0	0	7	0	0	0	0	0.15	0	0	0	0	16.4	0	0	0	0	13.6	0	0	0	0	6.8	0	0	0	0	4.2	0	0	0	0	24.6	0	0
CC	SU4b	9.4	-75.6333	9.3	3.7	31.6	0	0	0.3	0.1	1.01	0	0	20	17.2	22.1	0	0	7.8	4.5	21.2	0	0	14.7	4.7	49.5	0	0	7.3	2.9	24.8	0	0	29.6	12.2	95.6	0	0
CC	SU4c	9.43333	-75.6333	4.9	4.1	21.1	0	0	0.13	0.13	0.53	0	0	17.9	19.8	17.8	0	0	12.1	9.1	30.3	0	0	10.8	11.2	45.6	0	0	5.3	4.5	23.1	0	0	28.2	24.7	99.1	0	0
CC	BO1a	10.1667	-75.7833	0	0	35.5	0	0	0	0	1.11	0	0	0	0	19.5	0	0	0	0	50	0	0	0	0	21.8	0	0	0	0	28.4	0	0	0	0	100.3	0	0
CC	BO2a	9.78333	-75.8167	0	0	27.3	0	0	0	0	1.55	0	0	0	0	23.1	0	0	0	0	52.8	0	0	0	0	83.4	0	0	0	0	48.1	0	0	0	0	184.3	0	0
CC	BO2b	9.76667	-75.7833	0	5.6	14	0	0	0	0.46	0.74	0	0	0	27	25.2	0	0	0	15.4	30.8	0	0	0	29.5	47.5	0	0	0	6.9	17.2	0	0	0	51.8	95.5	0	0
CC	BO3a	10.1167	-75.5667	0	4.4	13.2	0	0	0	0.21	0.72	0	0	0	23.3	25.1	0	0	0	17.2	31	0	0	0	16.4	56.8	0	0	0	5.1	15.2	0	0	0	38.8	103	0	0
CC	BO3b	10.0667	-75.5333	0	2.9	9.4	0	0	0	0.1	0.37	0	0	0	20.2	21.6	0	0	0	17.9	28.6	0	0	0	3.8	35.9	0	0	0	3.3	10.8	0	0	0	25	53.6	0	0
CC	BO4a	10.1667	-75.5333	12.2	9.2	7.6	0	0	0.49	0.54	0.24	0	0	22.1	26.7	19.9	0	0	21.1	15.8	10.5	0	0	15.3	16.9	7.6	0	0	12.9	9.6	8	0	0	49.2	42.3	26.2	0	0
CC	MA1a	11.3167	-74.1333	7.1	0	16.5	0	0	0.26	0	0.38	0	0	21.6	0	17	0	0	20.8	0	25	0	0	24.7	0	35.7	0	0	9.5	0	22	0	0	54.9	0	82.8	0	0
CC	MA1b	11.3333	-74.05	0	26.8	13.4	0	0	0	2.49	1.89	0	0	0	30.2	38.6	0	0	0	31.2	18.8	0	0	0	55.4	42.2	0	0	0	47	23	0	0	0	133.6	84.5	0	0
CC	MA2a	11.05	-74.75	13	0	17.6	0	0	0.46	0	0.79	0	0	20.2	0	23.2	0	0	25.6	0	27.9	0	0	27.7	0	47.6	0	0	15.8	0	21.3	0	0	69.1	0	96.8	0	0
CC	MA3a	10.9667	-74.5	17.3	1.7	10.4	0	0	0.79	0.05	0.61	0	0	22.9	18.3	26.2	0	0	25	6.8	15.9	0	0	41.8	2.5	32.5	0	0	17.1	1.7	10.3	0	0	84	11	58.7	0	0
CC	MA3b	10.9667	-74.5167	33.9	2.3	0	0	0	0.83	0.06	0	0	0	17.5	17.7	0	0	0	30.9	7.8	0	0	0	40.2	2.7	0	0	0	14.2	0.9	0	0	0	84.9	11.3	0	0	0
CC	MA3c	10.8	-74.4667	37.4	0	1.8	0	0	1.79	0	0.12	0	0	23.3	0	27	0	0	48.5	0	3	0	0	78.6	0	5.4	0	0	42.6	0	2.1	0	0	169.7	0	10.5	0	0
CC	MA3d	10.9333	-74.3	14.3	0.8	4.2	0	0	1.07	0.02	0.23	0	0	29.3	19.2	26.1	0	0	33.3	6.7	13.3	0	0	66.6	1.5	14.3	0	0	19.6	1.2	5.8	0	0	119.6	9.3	33.4	0	0
CC	MA3e	10.7833	-74.3667	10.7	0	1	0	0	2.87	0	0.06	0	0	53.7	0	27	0	0	33.3	0	11.1	0	0	94.6	0	1.8	0	0	40.9	0	3.7	0	0	168.8	0	16.7	0	0
CC	MA3f	10.75	-74.3833	11.2	3.4	1.3	0	0	2.01	0.11	0.07	0	0	42.1	19.9	22.4	0	0	27.9	16.3	9.3	0	0	77.5	4.2	2.8	0	0	30	9.2	4.3	0	0	135.8	29.7	16.7	0	0
CC	GU1a	11.9167	-71.2833	44	0	0	0	0	1.05	0	0	0	0	17.4	0	0	0	0	20	0	0	0	0	63	0	0	0	0	28	0	0	0	0	111	0	0	0	0
CC	GU2a	12.2333	-71.8667	21	11	0	0	0	0.68	0.48	0	0	0	20.3	24	0	0	0	11.1	11.1	0	0	0	36.2	25.2	0	0	0	1.1	6.1	0	0	0	59.8	42.4	0	0	0
CC	GU3a	11.3333	-73.2	0	41.4	7.3	0	0	0	1.71	0.21	0	0	0	22.24	18.96	0	0	0	26	16	0	0	0	57	7.1	0	0	0	45	8	0	0	0	129.1	30.9	0	0
CC	GU4a	11.2667	-73.3167	0	31.9	0	0	3.4	0	1.33	0	0	0.08	0	21.3	0	0	13.3	0	33.3	0	0	11.1	0	64.2	0	0	3.9	0	28.4	0	0	2.9	0	125.9	0	0	17.9
OC	SA1a	12.5657	-81.7044	68.6	23.52	5.88	0	0	1.596	0.5472	0.1368	0	0	10.99	3.768	0.942	0	0	53	36	11	0	0	66	30	4	0	0	70	24	6	0	0	189	90	21	0	0
OC	SA1b	12.5657	-81.7044	70	70	60	0	0	1.61	1.61	1.794	0	0	5.46	5.46	4.68	0	0	31	41	28	0	0	20	30	50	0	0	35	35	30	0	0	86	106	108	0	0
OC	SA1c	12.5657	-81.7044	100.98	29.92	56.1	0	0	4.32	1.28	2.4	0	0	10.422	3.088	5.79	0	0	42	22	36	0	0	52	21	27	0	0	54	16	30	0	0	148	59	93	0	0
OC	SA1d	12.5657	-81.7044	14.88	19.53	58.59	0	0	0.9232	1.2117	3.6351	0	0	3.84	5.04	15.12	0	0	23	26	51	0	0	37	37	26	0	0	16	21	63	0	0	76	84	141	0	0
OC	SA2a	12.5261	-81.7274	0	0	85	0	0	0	0	5.1	0	0	0	0	24.11	0	0	0	0	100	0	0	0	0	100	0	0	0	0	100	0	0	0	0	300	0	0
OC	SA3a	12.555	-81.7089	0	11.2	28.8	0	0	0	4.6032	11.8368	0	0	0	17.2172	44.2728	0	0	0	39	61	0	0	0	20	80	0	0	0	28	72	0	0	0	76	213	0	0
OC	SA3b	12.5467	-81.7073	36	63	1	0	0	3.0276	5.2983	0.0841	0	0	9.936	17.388	0.276	0	0	37	60	3	0	0	18	82	0.4	0	0	36	63	1	0	0	91	205	5	0	0
OC	SA3c	12.5408	-81.7086	0	0.48	7.52	0	0	0	0.1932	3.0268	0	0	0	4.272	66.928	0	0	0	20	80	0	0	0	11	89	0	0	0	6	94	0	0	0	37	263	0	0
OC	SA4a	12.5241	-81.714	29.16	35.64	16.2	0	0	1.2132	1.4828	0.674	0	0	7.4016	9.0464	4.112	0	0	32	45	24	0	0	41	46	13	0	0	36	44	20	0	0	109	135	57	0	0
OC	SA4b	12.5241	-81.714	13.65	1.26	6.09	0	0	2.691	0.2484	1.2006	0	0	25.935	2.394	11.571	0	0	51	13	36	0	0	79	7	14	0	0	65	6	29	0	0	195	26	79	0	0
OC	SA4c	12.5033	-81.7187	0	7.44	16.56	0	0	0	1.3268	2.9532	0	0	0	14.384	32.016	0	0	0	43	57	0	0	0	50	50	0	0	0	31	69	0	0	0	124	176	0	0

## Sheet: ANOVA matrix
Coast	Code	LAT	LON	Species	DEN	BASA	DBH	FREQ	DOM	DENREL	IVI
P	NA1a	1.48639	-78.8228	A	0	0	0	0	0	0	0
P	NA1b	1.48583	-78.7993	A	0	0	0	0	0	0	0
P	NA1c	1.40889	-78.7682	A	0	0	0	0	0	0	0
P	NA2a	1.56475	-78.8956	A	0	0	0	0	0	0	0
P	NA2b	1.54804	-78.8939	A	0	0	0	0	0	0	0
P	NA2c	1.56444	-78.8686	A	0	0	0	0	0	0	0
P	NA2d	1.52739	-78.8655	A	0	0	0	0	0	0	0
P	NA3a	1.59569	-78.9401	A	0.377	0.046	39.4152	5.264	3.84	2.174	11.276
P	NA3b	1.62744	-79.0001	A	0	0	0	0	0	0	0
P	NA3c	1.61367	-78.9758	A	1.174	0.052	23.7478	9.524	2.433	4.615	16.573
P	NA3d	1.66389	-78.9958	A	13.559	0.679	25.2509	37.931	38.757	34.03	110.731
P	NA4a	1.76503	-78.8868	A	0	0	0	0	0	0	0
P	NA4b	1.76875	-78.8907	A	0.667	0.039	27.285	7.143	6.609	7.143	20.895
P	NA4c	1.73461	-78.9122	A	0	0	0	0	0	0	0
P	NA4d	1.81328	-78.8391	A	1.666	0.483	60.7563	12.5	28.053	6.25	46.803
P	NA5a	1.80284	-78.8276	A	0	0	0	0	0	0	0
P	NA5b	1.76848	-78.8245	A	0	0	0	0	0	0	0
P	NA5c	1.77331	-78.8217	A	0	0	0	0	0	0	0
P	NA5d	1.74317	-78.8127	A	0	0	0	0	0	0	0
P	NA6a	1.74778	-78.715	A	0.629	0.047	30.8446	10	4.58	3.226	18.183
P	NA6b	1.74747	-78.7163	A	0	0	0	0	0	0	0
P	NA6c	1.74522	-78.7667	A	0	0	0	0	0	0	0
P	NA6d	1.74575	-78.7667	A	0	0	0	0	0	0	0
P	NA7a	2.17024	-78.7031	A	5.208	0.618	38.8699	30	53.709	32.558	116.267
P	NA7b	2.2167	-78.673	A	0	0	0	0	0	0	0
P	NA7c	1.90519	-78.5383	A	0	0	0	0	0	0	0
P	NA7d	2.00832	-78.6223	A	0.944	0.238	56.6575	13.333	13.174	6.25	32.757
P	NA8a	2.35109	-78.6148	A	0	0	0	0	0	0	0
P	NA8b	2.42762	-78.5814	A	0	0	0	0	0	0	0
P	NA8c	2.2683	-78.6482	A	0	0	0	0	0	0	0
P	NA8d	2.40422	-78.5804	A	2.261	0.296	40.8273	6.667	10.078	10	26.744
P	NA9a	2.50422	-78.5082	A	0	0	0	0	0	0	0
P	NA9b	2.42046	-78.4801	A	0	0	0	0	0	0	0
P	NA9c	2.43339	-78.4518	A	0	0	0	0	0	0	0
P	NA10a	2.64261	-78.0215	A	0	0	0	0	0	0	0
P	NA10b	2.59362	-78.0948	A	0	0	0	0	0	0	0
P	CA1a	2.67556	-77.8089	A	0	0	0	0	0	0	0
P	CA1b	2.68065	-77.8935	A	0	0	0	0	0	0	0
P	CA1c	2.62765	-77.8846	A	7.481	1.039	42.0516	31.579	35.949	37.5	105.028
P	CA1d	2.64899	-77.9093	A	0	0	0	0	0	0	0
P	CA2a	2.90173	-77.6977	A	2.873	0.318	37.5406	23.077	13.249	10	46.326
P	CA2b	2.83232	-77.6922	A	0	0	0	0	0	0	0
P	CA3a	2.97917	-77.668	A	0	0	0	0	0	0	0
P	CA3b	3.05123	-77.6561	A	0	0	0	0	0	0	0
P	CA3c	3.18778	-77.4787	A	0	0	0	0	0	0	0
P	VC1a	3.36021	-77.4178	A	0	0	0	0	0	0	0
P	VC1b	3.38449	-77.3664	A	0	0	0	0	0	0	0
P	VC2a	3.51281	-77.2652	A	0	0	0	0	0	0	0
P	VC3a	3.6496	-77.1503	A	0	0	0	0	0	0	0
P	VC3b	3.76058	-77.1674	A	0	0	0	0	0	0	0
P	VC4a	3.81916	-77.1134	A	0	0	0	0	0	0	0
P	CH1a	4.29414	-77.4612	A	0	0	0	0	0	0	0
P	CH1b	4.55888	-77.3202	A	0	0	0	0	0	0	0
P	CH1c	4.41821	-77.3522	A	0	0	0	0	0	0	0
P	CH2a	5.39501	-77.4	A	0	0	0	0	0	0	0
P	CH2b	5.19702	-77.3694	A	1.219	1.085	106.455	5.882	7.408	5.556	18.846
P	CH2c	4.81485	-77.3299	A	0.666	0.018	18.5504	6.667	1.341	2.5	10.507
P	CH3a	5.8405	-77.2692	A	7.195	0.508	29.9828	27.273	36.778	32.353	93.404
P	CH3b	5.78913	-77.2408	A	0	0	0	0	0	0	0
P	CH3c	5.61625	-77.3461	A	0	0	0	0	0	0	0
P	CH3d	5.70809	-77.2644	A	2.222	0.111	25.22	7.692	16.71	12.5	36.906
CC	AN1a	8.53333	-76.9167	A	0	0	0	0	0	0	0
CC	AN2a	8.01667	-76.9167	A	0	0	0	0	0	0	0
CC	AN2b	8.01667	-76.9167	A	1.1	0.22	51.6	4.3	15.1	3.2	22.6
CC	AN2c	8.06667	-76.85	A	0	0	0	0	0	0	0
CC	AN2d	8.1	-76.9333	A	0	0	0	0	0	0	0
CC	AN2e	8.11667	-76.9333	A	0	0	0	0	0	0	0
CC	AN2f	8.18333	-76.9333	A	0	0	0	0	0	0	0
CC	CO1a	9.41667	-75.75	A	13.3	0.8	26.1	20.4	45.5	16.9	82.7
CC	CO2a	9.33333	-75.8667	A	0	0	0	0	0	0	0
CC	CO2b	9.43333	-75.8333	A	0	0	0	0	0	0	0
CC	CO2c	9.4	-75.85	A	2.9	0.18	28.3	5	12.2	1.7	18.9
CC	CO2d	9.41667	-75.8667	A	5.3	0.1	19.5	9.2	9.2	3.2	21.9
CC	CO2e	9.41667	-75.8833	A	6.4	0.6	30.1	12.8	30.9	11.3	55
CC	SU1a	9.46667	-75.6	A	6.4	0.18	18.3	18.2	17.5	5.8	41.6
CC	SU1b	9.951	-75.576	A	6.9	0.34	24.3	29.4	21.4	6.1	57
CC	SU2a	9.58333	-75.5667	A	0	0	0	0	0	0	0
CC	SU2b	9.58333	-75.5667	A	0	0	0	0	0	0	0
CC	SU3a	9.55	-75.5667	A	0	0	0	0	0	0	0
CC	SU3b	9.46667	-75.6	A	4.2	0.12	18.4	6.7	6.7	1.3	15.1
CC	SU4a	9.41667	-75.6167	A	0	0	0	0	0	0	0
CC	SU4b	9.4	-75.6333	A	9.3	0.3	20	7.8	14.7	7.3	29.6
CC	SU4c	9.43333	-75.6333	A	4.9	0.13	17.9	12.1	10.8	5.3	28.2
CC	BO1a	10.1667	-75.7833	A	0	0	0	0	0	0	0
CC	BO2a	9.78333	-75.8167	A	0	0	0	0	0	0	0
CC	BO2b	9.76667	-75.7833	A	0	0	0	0	0	0	0
CC	BO3a	10.1167	-75.5667	A	0	0	0	0	0	0	0
CC	BO3b	10.0667	-75.5333	A	0	0	0	0	0	0	0
CC	BO4a	10.1667	-75.5333	A	12.2	0.49	22.1	21.1	15.3	12.9	49.2
CC	MA1a	11.3167	-74.1333	A	7.1	0.26	21.6	20.8	24.7	9.5	54.9
CC	MA1b	11.3333	-74.05	A	0	0	0	0	0	0	0
CC	MA2a	11.05	-74.75	A	13	0.46	20.2	25.6	27.7	15.8	69.1
CC	MA3a	10.9667	-74.5	A	17.3	0.79	22.9	25	41.8	17.1	84
CC	MA3b	10.9667	-74.5167	A	33.9	0.83	17.5	30.9	40.2	14.2	84.9
CC	MA3c	10.8	-74.4667	A	37.4	1.79	23.3	48.5	78.6	42.6	169.7
CC	MA3d	10.9333	-74.3	A	14.3	1.07	29.3	33.3	66.6	19.6	119.6
CC	MA3e	10.7833	-74.3667	A	10.7	2.87	53.7	33.3	94.6	40.9	168.8
CC	MA3f	10.75	-74.3833	A	11.2	2.01	42.1	27.9	77.5	30	135.8
CC	GU1a	11.9167	-71.2833	A	44	1.05	17.4	20	63	28	111
CC	GU2a	12.2333	-71.8667	A	21	0.68	20.3	11.1	36.2	1.1	59.8
CC	GU3a	11.3333	-73.2	A	0	0	0	0	0	0	0
CC	GU4a	11.2667	-73.3167	A	0	0	0	0	0	0	0
OC	SA1a	12.5657	-81.7044	A	68.6	1.596	10.99	53	66	70	189
OC	SA1b	12.5657	-81.7044	A	70	1.61	5.46	31	20	35	86
OC	SA1c	12.5657	-81.7044	A	100.98	4.32	10.422	42	52	54	148
OC	SA1d	12.5657	-81.7044	A	14.88	0.9232	3.84	23	37	16	76
OC	SA2a	12.5261	-81.7274	A	0	0	0	0	0	0	0
OC	SA3a	12.555	-81.7089	A	0	0	0	0	0	0	0
OC	SA3b	12.5467	-81.7073	A	36	3.0276	9.936	37	18	36	91
OC	SA3c	12.5408	-81.7086	A	0	0	0	0	0	0	0
OC	SA4a	12.5241	-81.714	A	29.16	1.2132	7.4016	32	41	36	109
OC	SA4b	12.5241	-81.714	A	13.65	2.691	25.935	51	79	65	195
OC	SA4c	12.5033	-81.7187	A	0	0	0	0	0	0	0
P	NA1a	1.48639	-78.8228	L	0	0	0	0	0	0	0
P	NA1b	1.48583	-78.7993	L	0	0	0	0	0	0	0
P	NA1c	1.40889	-78.7682	L	0	0	0	0	0	0	0
P	NA2a	1.56475	-78.8956	L	0	0	0	0	0	0	0
P	NA2b	1.54804	-78.8939	L	0	0	0	0	0	0	0
P	NA2c	1.56444	-78.8686	L	0	0	0	0	0	0	0
P	NA2d	1.52739	-78.8655	L	0	0	0	0	0	0	0
P	NA3a	1.59569	-78.9401	L	1.506	0.087	27.1208	15.789	7.214	8.696	31.669
P	NA3b	1.62744	-79.0001	L	0	0	0	0	0	0	0
P	NA3c	1.61367	-78.9758	L	0	0	0	0	0	0	0
P	NA3d	1.66389	-78.9958	L	16.102	0.621	22.1596	34.483	35.436	40.426	110.344
P	NA4a	1.76503	-78.8868	L	0	0	0	0	0	0	0
P	NA4b	1.76875	-78.8907	L	0.89	0.03	20.7167	14.286	5.11	9.524	28.92
P	NA4c	1.73461	-78.9122	L	0	0	0	0	0	0	0
P	NA4d	1.81328	-78.8391	L	0	0	0	0	0	0	0
P	NA5a	1.80284	-78.8276	L	1.799	0.116	28.6529	23.077	24.5	17.857	65.434
P	NA5b	1.76848	-78.8245	L	0	0	0	0	0	0	0
P	NA5c	1.77331	-78.8217	L	0	0	0	0	0	0	0
P	NA5d	1.74317	-78.8127	L	0	0	0	0	0	0	0
P	NA6a	1.74778	-78.715	L	0	0	0	0	0	0	0
P	NA6b	1.74747	-78.7163	L	0	0	0	0	0	0	0
P	NA6c	1.74522	-78.7667	L	0.604	0.088	43.0703	11.111	12.663	6.061	29.835
P	NA6d	1.74575	-78.7667	L	0	0	0	0	0	0	0
P	NA7a	2.17024	-78.7031	L	0.372	0.007	15.4786	5	0.642	2.326	7.967
P	NA7b	2.2167	-78.673	L	0	0	0	0	0	0	0
P	NA7c	1.90519	-78.5383	L	0	0	0	0	0	0	0
P	NA7d	2.00832	-78.6223	L	0	0	0	0	0	0	0
P	NA8a	2.35109	-78.6148	L	0	0	0	0	0	0	0
P	NA8b	2.42762	-78.5814	L	0	0	0	0	0	0	0
P	NA8c	2.2683	-78.6482	L	0	0	0	0	0	0	0
P	NA8d	2.40422	-78.5804	L	0	0	0	0	0	0	0
P	NA9a	2.50422	-78.5082	L	0	0	0	0	0	0	0
P	NA9b	2.42046	-78.4801	L	0	0	0	0	0	0	0
P	NA9c	2.43339	-78.4518	L	0	0	0	0	0	0	0
P	NA10a	2.64261	-78.0215	L	0	0	0	0	0	0	0
P	NA10b	2.59362	-78.0948	L	0	0	0	0	0	0	0
P	CA1a	2.67556	-77.8089	L	0	0	0	0	0	0	0
P	CA1b	2.68065	-77.8935	L	0	0	0	0	0	0	0
P	CA1c	2.62765	-77.8846	L	0	0	0	0	0	0	0
P	CA1d	2.64899	-77.9093	L	0	0	0	0	0	0	0
P	CA2a	2.90173	-77.6977	L	0	0	0	0	0	0	0
P	CA2b	2.83232	-77.6922	L	0	0	0	0	0	0	0
P	CA3a	2.97917	-77.668	L	0	0	0	0	0	0	0
P	CA3b	3.05123	-77.6561	L	0	0	0	0	0	0	0
P	CA3c	3.18778	-77.4787	L	0	0	0	0	0	0	0
P	VC1a	3.36021	-77.4178	L	0	0	0	0	0	0	0
P	VC1b	3.38449	-77.3664	L	0	0	0	0	0	0	0
P	VC2a	3.51281	-77.2652	L	0.934	0.026	18.8264	6.677	1.619	2.703	10.988
P	VC3a	3.6496	-77.1503	L	0	0	0	0	0	0	0
P	VC3b	3.76058	-77.1674	L	0	0	0	0	0	0	0
P	VC4a	3.81916	-77.1134	L	0	0	0	0	0	0	0
P	CH1a	4.29414	-77.4612	L	0	0	0	0	0	0	0
P	CH1b	4.55888	-77.3202	L	0	0	0	0	0	0	0
P	CH1c	4.41821	-77.3522	L	0	0	0	0	0	0	0
P	CH2a	5.39501	-77.4	L	0	0	0	0	0	0	0
P	CH2b	5.19702	-77.3694	L	0	0	0	0	0	0	0
P	CH2c	4.81485	-77.3299	L	0	0	0	0	0	0	0
P	CH3a	5.8405	-77.2692	L	0	0	0	0	0	0	0
P	CH3b	5.78913	-77.2408	L	0	0	0	0	0	0	0
P	CH3c	5.61625	-77.3461	L	0	0	0	0	0	0	0
P	CH3d	5.70809	-77.2644	L	0	0	0	0	0	0	0
CC	AN1a	8.53333	-76.9167	L	1.6	0.14	33	3.7	5.4	1.5	10.6
CC	AN2a	8.01667	-76.9167	L	0	0	0	0	0	0	0
CC	AN2b	8.01667	-76.9167	L	0	0	0	0	0	0	0
CC	AN2c	8.06667	-76.85	L	4.7	0.1	22.2	23.8	11.7	6	41.6
CC	AN2d	8.1	-76.9333	L	1.3	0.09	30	5	5.1	3.8	14
CC	AN2e	8.11667	-76.9333	L	0	0	0	0	0	0	0
CC	AN2f	8.18333	-76.9333	L	6.5	0.26	29.2	22.7	24.4	8.4	55.5
CC	CO1a	9.41667	-75.75	L	0.9	1.29	10	2	0	1.1	4.4
CC	CO2a	9.33333	-75.8667	L	0	0	0	0	0	0	0
CC	CO2b	9.43333	-75.8333	L	3.6	0.29	31.7	3.2	12.5	3.9	19.6
CC	CO2c	9.4	-75.85	L	0	0	0	0	0	0	0
CC	CO2d	9.41667	-75.8667	L	2.7	0.35	21.3	3.1	3.1	1.7	7.8
CC	CO2e	9.41667	-75.8833	L	4.1	0.36	32.6	10.3	18.4	7.2	35.9
CC	SU1a	9.46667	-75.6	L	2.6	0.15	26	9.1	14.3	2.4	25.8
CC	SU1b	9.951	-75.576	L	1	0.02	17.9	5.9	1.6	0.9	8.3
CC	SU2a	9.58333	-75.5667	L	0	0	0	0	0	0	0
CC	SU2b	9.58333	-75.5667	L	0	0	0	0	0	0	0
CC	SU3a	9.55	-75.5667	L	0	0	0	0	0	0	0
CC	SU3b	9.46667	-75.6	L	8.4	0.2	16.9	13.3	12.1	2.5	28
CC	SU4a	9.41667	-75.6167	L	0	0	0	0	0	0	0
CC	SU4b	9.4	-75.6333	L	3.7	0.1	17.2	4.5	4.7	2.9	12.2
CC	SU4c	9.43333	-75.6333	L	4.1	0.13	19.8	9.1	11.2	4.5	24.7
CC	BO1a	10.1667	-75.7833	L	0	0	0	0	0	0	0
CC	BO2a	9.78333	-75.8167	L	0	0	0	0	0	0	0
CC	BO2b	9.76667	-75.7833	L	5.6	0.46	27	15.4	29.5	6.9	51.8
CC	BO3a	10.1167	-75.5667	L	4.4	0.21	23.3	17.2	16.4	5.1	38.8
CC	BO3b	10.0667	-75.5333	L	2.9	0.1	20.2	17.9	3.8	3.3	25
CC	BO4a	10.1667	-75.5333	L	9.2	0.54	26.7	15.8	16.9	9.6	42.3
CC	MA1a	11.3167	-74.1333	L	0	0	0	0	0	0	0
CC	MA1b	11.3333	-74.05	L	26.8	2.49	30.2	31.2	55.4	47	133.6
CC	MA2a	11.05	-74.75	L	0	0	0	0	0	0	0
CC	MA3a	10.9667	-74.5	L	1.7	0.05	18.3	6.8	2.5	1.7	11
CC	MA3b	10.9667	-74.5167	L	2.3	0.06	17.7	7.8	2.7	0.9	11.3
CC	MA3c	10.8	-74.4667	L	0	0	0	0	0	0	0
CC	MA3d	10.9333	-74.3	L	0.8	0.02	19.2	6.7	1.5	1.2	9.3
CC	MA3e	10.7833	-74.3667	L	0	0	0	0	0	0	0
CC	MA3f	10.75	-74.3833	L	3.4	0.11	19.9	16.3	4.2	9.2	29.7
CC	GU1a	11.9167	-71.2833	L	0	0	0	0	0	0	0
CC	GU2a	12.2333	-71.8667	L	11	0.48	24	11.1	25.2	6.1	42.4
CC	GU3a	11.3333	-73.2	L	41.4	1.71	22.24	26	57	45	129.1
CC	GU4a	11.2667	-73.3167	L	31.9	1.33	21.3	33.3	64.2	28.4	125.9
OC	SA1a	12.5657	-81.7044	L	23.52	0.5472	3.768	36	30	24	90
OC	SA1b	12.5657	-81.7044	L	70	1.61	5.46	41	30	35	106
OC	SA1c	12.5657	-81.7044	L	29.92	1.28	3.088	22	21	16	59
OC	SA1d	12.5657	-81.7044	L	19.53	1.2117	5.04	26	37	21	84
OC	SA2a	12.5261	-81.7274	L	0	0	0	0	0	0	0
OC	SA3a	12.555	-81.7089	L	11.2	4.6032	17.2172	39	20	28	76
OC	SA3b	12.5467	-81.7073	L	63	5.2983	17.388	60	82	63	205
OC	SA3c	12.5408	-81.7086	L	0.48	0.1932	4.272	20	11	6	37
OC	SA4a	12.5241	-81.714	L	35.64	1.4828	9.0464	45	46	44	135
OC	SA4b	12.5241	-81.714	L	1.26	0.2484	2.394	13	7	6	26
OC	SA4c	12.5033	-81.7187	L	7.44	1.3268	14.384	43	50	31	124
P	NA1a	1.48639	-78.8228	R	20.977	1.254	27.5888	83.333	95.104	95.238	273.675
P	NA1b	1.48583	-78.7993	R	14.955	0.732	24.9642	85.714	78.063	93.333	257.111
P	NA1c	1.40889	-78.7682	R	8.751	0.601	29.5708	61.538	75.912	69.697	207.148
P	NA2a	1.56475	-78.8956	R	14.154	0.747	25.9224	100	100	100	300
P	NA2b	1.54804	-78.8939	R	18.551	1.128	27.8244	100	100	100	300
P	NA2c	1.56444	-78.8686	R	15.369	0.773	25.3059	92.857	98.913	97.826	289.596
P	NA2d	1.52739	-78.8655	R	26.12	1.938	30.7359	100	100	100	300
P	NA3a	1.59569	-78.9401	R	15.44	1.069	29.6907	78.947	88.947	89.13	257.025
P	NA3b	1.62744	-79.0001	R	10.1	0.636	28.3154	41.176	29.814	30	100.99
P	NA3c	1.61367	-78.9758	R	23.486	2.048	33.3208	80.952	92.109	92.308	269.369
P	NA3d	1.66389	-78.9958	R	10.169	0.452	23.7895	27.586	25.807	25.532	78.925
P	NA4a	1.76503	-78.8868	R	18.408	1.946	36.6879	94.444	99.558	98.525	292.532
P	NA4b	1.76875	-78.8907	R	7.786	0.516	29.0484	78.571	88.281	83.333	250.186
P	NA4c	1.73461	-78.9122	R	11.941	0.967	32.1106	100	100	100	100
P	NA4d	1.81328	-78.8391	R	13.328	0.458	20.9173	50	26.618	50	126.618
P	NA5a	1.80284	-78.8276	R	8.273	0.358	23.4728	76.923	75.5	82.143	234.566
P	NA5b	1.76848	-78.8245	R	12.178	0.823	29.3337	71.429	90.718	84.211	246.358
P	NA5c	1.77331	-78.8217	R	10.278	0.735	30.1748	100	100	100	300
P	NA5d	1.74317	-78.8127	R	14.017	1.346	34.9663	40	48.679	53.125	141.804
P	NA6a	1.74778	-78.715	R	18.87	0.91	24.7793	90	95.042	96.774	281.817
P	NA6b	1.74747	-78.7163	R	19.48	1.123	27.0926	87.5	95.656	96.426	279.584
P	NA6c	1.74522	-78.7667	R	9.356	0.606	28.7175	88.889	87.337	93.939	270.165
P	NA6d	1.74575	-78.7667	R	10.848	0.536	25.082	71.429	72.521	78.378	222.328
P	NA7a	2.17024	-78.7031	R	2.604	0.104	22.5502	25	9.029	16.279	50.308
P	NA7b	2.2167	-78.673	R	10.267	1.001	35.2331	40	31.935	36.111	108.046
P	NA7c	1.90519	-78.5383	R	15.972	1.073	29.2466	100	100	100	300
P	NA7d	2.00832	-78.6223	R	14.158	1.569	37.5635	86.667	86.826	93.75	267.243
P	NA8a	2.35109	-78.6148	R	28.468	1.593	26.6922	100	100	100	300
P	NA8b	2.42762	-78.5814	R	27.901	2.007	30.2635	73.333	93.005	88.636	254.975
P	NA8c	2.2683	-78.6482	R	26.529	2.108	31.8075	52.381	72.277	63.636	188.294
P	NA8d	2.40422	-78.5804	R	6.784	1.1	45.4369	40	37.451	30	107.451
P	NA9a	2.50422	-78.5082	R	15.982	0.72	23.95	100	100	100	300
P	NA9b	2.42046	-78.4801	R	12.559	1.374	37.3225	87.5	99.27	96.154	282.924
P	NA9c	2.43339	-78.4518	R	11.774	1.924	45.6137	69.231	92.991	80	242.222
P	NA10a	2.64261	-78.0215	R	36.439	2.145	27.377	100	100	100	300
P	NA10b	2.59362	-78.0948	R	35.086	2.115	27.7041	70	80.787	78.125	228.912
P	CA1a	2.67556	-77.8089	R	23.154	1.226	25.9649	40	46.469	56.41	142.879
P	CA1b	2.68065	-77.8935	R	31.326	1.882	27.6575	100	100	100	300
P	CA1c	2.62765	-77.8846	R	0.499	0.019	22.0182	5.263	0.65	2.5	8.413
P	CA1d	2.64899	-77.9093	R	15.52	1.808	38.5131	66.667	75.781	81.579	224.026
P	CA2a	2.90173	-77.6977	R	25.855	2.08	32.0048	76.923	86.751	90	253.674
P	CA2b	2.83232	-77.6922	R	6.49	1.037	45.1047	16.667	26.086	12	54.752
P	CA3a	2.97917	-77.668	R	38.613	3.148	32.2185	90.909	99.316	97.5	287.725
P	CA3b	3.05123	-77.6561	R	40.849	3.231	31.7346	71.429	92.264	84.615	248.308
P	CA3c	3.18778	-77.4787	R	28.554	3.293	38.3193	58.824	76.293	75	210.116
P	VC1a	3.36021	-77.4178	R	19.68	1.402	30.1173	76.923	94.871	90	261.794
P	VC1b	3.38449	-77.3664	R	13.196	1.197	33.9845	41.667	38.477	42.5	122.644
P	VC2a	3.51281	-77.2652	R	24.292	1.264	25.7393	60	77.27	70.27	207.54
P	VC3a	3.6496	-77.1503	R	18.505	0.985	26.0333	60	87.699	80	227.699
P	VC3b	3.76058	-77.1674	R	21	1.06	25.3512	62.5	71.668	77.5	211.668
P	VC4a	3.81916	-77.1134	R	18.348	0.777	23.2205	61.538	85.741	84.375	231.655
P	CH1a	4.29414	-77.4612	R	19.556	2.107	37.038	52.632	70.662	67.5	190.793
P	CH1b	4.55888	-77.3202	R	18.728	0.799	23.3068	66.667	73.197	77.778	217.641
P	CH1c	4.41821	-77.3522	R	21.024	0.913	23.5143	91.667	97.113	97.436	286.215
P	CH2a	5.39501	-77.4	R	14.782	1.583	36.9257	100	100	100	300
P	CH2b	5.19702	-77.3694	R	9.755	0.646	29.0374	41.176	56.393	44.444	142.014
P	CH2c	4.81485	-77.3299	R	23.324	1.243	26.0489	66.667	93.045	87.5	247.211
P	CH3a	5.8405	-77.2692	R	14.389	0.876	27.8414	63.636	58.195	64.706	189.537
P	CH3b	5.78913	-77.2408	R	29.008	1.324	24.1068	100	100	100	300
P	CH3c	5.61625	-77.3461	R	11.149	1.525	41.7323	77.778	93.23	86.667	257.674
P	CH3d	5.70809	-77.2644	R	8.889	0.324	21.5427	53.846	48.592	50	152.438
CC	AN1a	8.53333	-76.9167	R	33.6	2.13	28.2	55.6	84.8	31.4	171.8
CC	AN2a	8.01667	-76.9167	R	40	2.57	27.1	70	94.8	54.8	219.6
CC	AN2b	8.01667	-76.9167	R	17.3	1.11	27.6	51.2	74	51.6	177.7
CC	AN2c	8.06667	-76.85	R	25.5	0.63	23	38.1	74.8	32.6	145.6
CC	AN2d	8.1	-76.9333	R	23.2	1.59	27.7	70	89.6	69.2	222.8
CC	AN2e	8.11667	-76.9333	R	44.3	2.52	22	79.3	99.8	83.7	262.7
CC	AN2f	8.18333	-76.9333	R	16.6	0.68	30.7	31.8	63.6	21.5	116.9
CC	CO1a	9.41667	-75.75	R	10.7	0.43	22	20.4	24.5	13.5	58.3
CC	CO2a	9.33333	-75.8667	R	35.5	1.53	22.5	53.8	83	52.1	189
CC	CO2b	9.43333	-75.8333	R	34.5	1.81	25.2	48.4	78.6	37.3	164.2
CC	CO2c	9.4	-75.85	R	20	0.88	23.2	30	59.2	11.7	100.9
CC	CO2d	9.41667	-75.8667	R	27.6	1.31	21.5	33.8	33.8	17.5	85.2
CC	CO2e	9.41667	-75.8833	R	10.5	0.77	30	20.5	39.5	18.5	78.6
CC	SU1a	9.46667	-75.6	R	6.4	0.23	20.8	18.2	22.9	5.8	46.8
CC	SU1b	9.951	-75.576	R	11.9	0.59	24	29.4	37.2	10.4	77.1
CC	SU2a	9.58333	-75.5667	R	38.5	3.66	35.1	59.1	97.8	54.2	211.1
CC	SU2b	9.58333	-75.5667	R	0.8	0.04	25	1.3	5.5	0.5	7.3
CC	SU3a	9.55	-75.5667	R	33.5	1.66	22.4	23.5	79	25.4	127.9
CC	SU3b	9.46667	-75.6	R	0	0	0	0	0	0	0
CC	SU4a	9.41667	-75.6167	R	7	0.15	16.4	13.6	6.8	4.2	24.6
CC	SU4b	9.4	-75.6333	R	31.6	1.01	22.1	21.2	49.5	24.8	95.6
CC	SU4c	9.43333	-75.6333	R	21.1	0.53	17.8	30.3	45.6	23.1	99.1
CC	BO1a	10.1667	-75.7833	R	35.5	1.11	19.5	50	21.8	28.4	100.3
CC	BO2a	9.78333	-75.8167	R	27.3	1.55	23.1	52.8	83.4	48.1	184.3
CC	BO2b	9.76667	-75.7833	R	14	0.74	25.2	30.8	47.5	17.2	95.5
CC	BO3a	10.1167	-75.5667	R	13.2	0.72	25.1	31	56.8	15.2	103
CC	BO3b	10.0667	-75.5333	R	9.4	0.37	21.6	28.6	35.9	10.8	53.6
CC	BO4a	10.1667	-75.5333	R	7.6	0.24	19.9	10.5	7.6	8	26.2
CC	MA1a	11.3167	-74.1333	R	16.5	0.38	17	25	35.7	22	82.8
CC	MA1b	11.3333	-74.05	R	13.4	1.89	38.6	18.8	42.2	23	84.5
CC	MA2a	11.05	-74.75	R	17.6	0.79	23.2	27.9	47.6	21.3	96.8
CC	MA3a	10.9667	-74.5	R	10.4	0.61	26.2	15.9	32.5	10.3	58.7
CC	MA3b	10.9667	-74.5167	R	0	0	0	0	0	0	0
CC	MA3c	10.8	-74.4667	R	1.8	0.12	27	3	5.4	2.1	10.5
CC	MA3d	10.9333	-74.3	R	4.2	0.23	26.1	13.3	14.3	5.8	33.4
CC	MA3e	10.7833	-74.3667	R	1	0.06	27	11.1	1.8	3.7	16.7
CC	MA3f	10.75	-74.3833	R	1.3	0.07	22.4	9.3	2.8	4.3	16.7
CC	GU1a	11.9167	-71.2833	R	0	0	0	0	0	0	0
CC	GU2a	12.2333	-71.8667	R	0	0	0	0	0	0	0
CC	GU3a	11.3333	-73.2	R	7.3	0.21	18.96	16	7.1	8	30.9
CC	GU4a	11.2667	-73.3167	R	0	0	0	0	0	0	0
OC	SA1a	12.5657	-81.7044	R	5.88	0.1368	0.942	11	4	6	21
OC	SA1b	12.5657	-81.7044	R	60	1.794	4.68	28	50	30	108
OC	SA1c	12.5657	-81.7044	R	56.1	2.4	5.79	36	27	30	93
OC	SA1d	12.5657	-81.7044	R	58.59	3.6351	15.12	51	26	63	141
OC	SA2a	12.5261	-81.7274	R	85	5.1	24.11	100	100	100	300
OC	SA3a	12.555	-81.7089	R	28.8	11.8368	44.2728	61	80	72	213
OC	SA3b	12.5467	-81.7073	R	1	0.0841	0.276	3	0.4	1	5
OC	SA3c	12.5408	-81.7086	R	7.52	3.0268	66.928	80	89	94	263
OC	SA4a	12.5241	-81.714	R	16.2	0.674	4.112	24	13	20	57
OC	SA4b	12.5241	-81.714	R	6.09	1.2006	11.571	36	14	29	79
OC	SA4c	12.5033	-81.7187	R	16.56	2.9532	32.016	57	50	69	176
P	NA1a	1.48639	-78.8228	P	0	0	0	0	0	0	0
P	NA1b	1.48583	-78.7993	P	1.068	0.206	49.5568	14.286	21.937	6.667	42.889
P	NA1c	1.40889	-78.7682	P	3.424	0.095	18.7953	30.769	11.963	27.293	70.005
P	NA2a	1.56475	-78.8956	P	0	0	0	0	0	0	0
P	NA2b	1.54804	-78.8939	P	0	0	0	0	0	0	0
P	NA2c	1.56444	-78.8686	P	0	0	0	0	0	0	0
P	NA2d	1.52739	-78.8655	P	0	0	0	0	0	0	0
P	NA3a	1.59569	-78.9401	P	0	0	0	0	0	0	0
P	NA3b	1.62744	-79.0001	P	3.367	0.225	29.1692	11.765	10.559	10	32.324
P	NA3c	1.61367	-78.9758	P	0.391	0.01	18.0454	4.762	0.452	1.538	6.752
P	NA3d	1.66389	-78.9958	P	0	0	0	0	0	0	0
P	NA4a	1.76503	-78.8868	P	0	0	0	0	0	0	0
P	NA4b	1.76875	-78.8907	P	0	0	0	0	0	0	0
P	NA4c	1.73461	-78.9122	P	0	0	0	0	0	0	0
P	NA4d	1.81328	-78.8391	P	0	0	0	0	0	0	0
P	NA5a	1.80284	-78.8276	P	0	0	0	0	0	0	0
P	NA5b	1.76848	-78.8245	P	2.283	0.084	21.6442	28.571	9.282	15.789	53.642
P	NA5c	1.77331	-78.8217	P	0	0	0	0	0	0	0
P	NA5d	1.74317	-78.8127	P	4.947	0.142	19.1174	26.667	5.149	18.75	50.566
P	NA6a	1.74778	-78.715	P	0	0	0	0	0	0	0
P	NA6b	1.74747	-78.7163	P	0	0	0	0	0	0	0
P	NA6c	1.74522	-78.7667	P	0	0	0	0	0	0	0
P	NA6d	1.74575	-78.7667	P	0	0	0	0	0	0	0
P	NA7a	2.17024	-78.7031	P	7.811	0.421	26.1965	40	36.621	48.837	125.458
P	NA7b	2.2167	-78.673	P	0	0	0	0	0	0	0
P	NA7c	1.90519	-78.5383	P	0	0	0	0	0	0	0
P	NA7d	2.00832	-78.6223	P	0	0	0	0	0	0	0
P	NA8a	2.35109	-78.6148	P	0	0	0	0	0	0	0
P	NA8b	2.42762	-78.5814	P	0.715	0.047	28.9302	6.667	2.19	2.273	11.129
P	NA8c	2.2683	-78.6482	P	1.895	0.099	25.791	4.762	3.378	4.545	12.686
P	NA8d	2.40422	-78.5804	P	0	0	0	0	0	0	0
P	NA9a	2.50422	-78.5082	P	0	0	0	0	0	0	0
P	NA9b	2.42046	-78.4801	P	0	0	0	0	0	0	0
P	NA9c	2.43339	-78.4518	P	0	0	0	0	0	0	0
P	NA10a	2.64261	-78.0215	P	0	0	0	0	0	0	0
P	NA10b	2.59362	-78.0948	P	0	0	0	0	0	0	0
P	CA1a	2.67556	-77.8089	P	8.42	0.688	32.2547	25	26.084	20.513	71.597
P	CA1b	2.68065	-77.8935	P	0	0	0	0	0	0	0
P	CA1c	2.62765	-77.8846	P	0	0	0	0	0	0	0
P	CA1d	2.64899	-77.9093	P	0.501	0.017	20.7855	6.667	0.713	2.632	10.011
P	CA2a	2.90173	-77.6977	P	0	0	0	0	0	0	0
P	CA2b	2.83232	-77.6922	P	8.653	0.217	17.8691	8.333	5.457	16	29.791
P	CA3a	2.97917	-77.668	P	0	0	0	0	0	0	0
P	CA3b	3.05123	-77.6561	P	2.476	0.053	16.5089	7.143	1.511	5.128	13.783
P	CA3c	3.18778	-77.4787	P	0	0	0	0	0	0	0
P	VC1a	3.36021	-77.4178	P	2.187	0.076	21.0348	23.077	5.129	10	38.206
P	VC1b	3.38449	-77.3664	P	4.658	0.188	22.6691	16.667	6.054	15	37.72
P	VC2a	3.51281	-77.2652	P	4.672	0.122	18.2341	13.333	7.482	13.514	34.329
P	VC3a	3.6496	-77.1503	P	4.048	0.115	19.0188	33.337	10.255	17.5	61.88
P	VC3b	3.76058	-77.1674	P	0	0	0	0	0	0	0
P	VC4a	3.81916	-77.1134	P	1.359	0.027	15.9048	15.385	3.021	6.25	24.655
P	CH1a	4.29414	-77.4612	P	1.449	0.044	19.6629	10.526	1.471	5	16.998
P	CH1b	4.55888	-77.3202	P	0	0	0	0	0	0	0
P	CH1c	4.41821	-77.3522	P	0	0	0	0	0	0	0
P	CH2a	5.39501	-77.4	P	0	0	0	0	0	0	0
P	CH2b	5.19702	-77.3694	P	9.755	0.341	21.0969	41.176	29.76	44.444	115.381
P	CH2c	4.81485	-77.3299	P	0	0	0	0	0	0	0
P	CH3a	5.8405	-77.2692	P	0	0	0	0	0	0	0
P	CH3b	5.78913	-77.2408	P	0	0	0	0	0	0	0
P	CH3c	5.61625	-77.3461	P	0	0	0	0	0	0	0
P	CH3d	5.70809	-77.2644	P	0	0	0	0	0	0	0
CC	AN1a	8.53333	-76.9167	P	0	0	0	0	0	0	0
CC	AN2a	8.01667	-76.9167	P	0	0	0	0	0	0	0
CC	AN2b	8.01667	-76.9167	P	0	0	0	0	0	0	0
CC	AN2c	8.06667	-76.85	P	0	0	0	0	0	0	0
CC	AN2d	8.1	-76.9333	P	0	0	0	0	0	0	0
CC	AN2e	8.11667	-76.9333	P	0	0	0	0	0	0	0
CC	AN2f	8.18333	-76.9333	P	0	0	0	0	0	0	0
CC	CO1a	9.41667	-75.75	P	0	0	0	0	0	0	0
CC	CO2a	9.33333	-75.8667	P	0	0	0	0	0	0	0
CC	CO2b	9.43333	-75.8333	P	0	0	0	0	0	0	0
CC	CO2c	9.4	-75.85	P	0	0	0	0	0	0	0
CC	CO2d	9.41667	-75.8667	P	0	0	0	0	0	0	0
CC	CO2e	9.41667	-75.8833	P	0	0	0	0	0	0	0
CC	SU1a	9.46667	-75.6	P	0	0	0	0	0	0	0
CC	SU1b	9.951	-75.576	P	0	0	0	0	0	0	0
CC	SU2a	9.58333	-75.5667	P	0	0	0	0	0	0	0
CC	SU2b	9.58333	-75.5667	P	0	0	0	0	0	0	0
CC	SU3a	9.55	-75.5667	P	0	0	0	0	0	0	0
CC	SU3b	9.46667	-75.6	P	0	0	0	0	0	0	0
CC	SU4a	9.41667	-75.6167	P	0	0	0	0	0	0	0
CC	SU4b	9.4	-75.6333	P	0	0	0	0	0	0	0
CC	SU4c	9.43333	-75.6333	P	0	0	0	0	0	0	0
CC	BO1a	10.1667	-75.7833	P	0	0	0	0	0	0	0
CC	BO2a	9.78333	-75.8167	P	0	0	0	0	0	0	0
CC	BO2b	9.76667	-75.7833	P	0	0	0	0	0	0	0
CC	BO3a	10.1167	-75.5667	P	0	0	0	0	0	0	0
CC	BO3b	10.0667	-75.5333	P	0	0	0	0	0	0	0
CC	BO4a	10.1667	-75.5333	P	0	0	0	0	0	0	0
CC	MA1a	11.3167	-74.1333	P	0	0	0	0	0	0	0
CC	MA1b	11.3333	-74.05	P	0	0	0	0	0	0	0
CC	MA2a	11.05	-74.75	P	0	0	0	0	0	0	0
CC	MA3a	10.9667	-74.5	P	0	0	0	0	0	0	0
CC	MA3b	10.9667	-74.5167	P	0	0	0	0	0	0	0
CC	MA3c	10.8	-74.4667	P	0	0	0	0	0	0	0
CC	MA3d	10.9333	-74.3	P	0	0	0	0	0	0	0
CC	MA3e	10.7833	-74.3667	P	0	0	0	0	0	0	0
CC	MA3f	10.75	-74.3833	P	0	0	0	0	0	0	0
CC	GU1a	11.9167	-71.2833	P	0	0	0	0	0	0	0
CC	GU2a	12.2333	-71.8667	P	0	0	0	0	0	0	0
CC	GU3a	11.3333	-73.2	P	0	0	0	0	0	0	0
CC	GU4a	11.2667	-73.3167	P	0	0	0	0	0	0	0
OC	SA1a	12.5657	-81.7044	P	0	0	0	0	0	0	0
OC	SA1b	12.5657	-81.7044	P	0	0	0	0	0	0	0
OC	SA1c	12.5657	-81.7044	P	0	0	0	0	0	0	0
OC	SA1d	12.5657	-81.7044	P	0	0	0	0	0	0	0
OC	SA2a	12.5261	-81.7274	P	0	0	0	0	0	0	0
OC	SA3a	12.555	-81.7089	P	0	0	0	0	0	0	0
OC	SA3b	12.5467	-81.7073	P	0	0	0	0	0	0	0
OC	SA3c	12.5408	-81.7086	P	0	0	0	0	0	0	0
OC	SA4a	12.5241	-81.714	P	0	0	0	0	0	0	0
OC	SA4b	12.5241	-81.714	P	0	0	0	0	0	0	0
OC	SA4c	12.5033	-81.7187	P	0	0	0	0	0	0	0
P	NA1a	1.48639	-78.8228	C	1.049	0.065	28.0882	16.667	4.896	4.762	26.325
P	NA1b	1.48583	-78.7993	C	0	0	0	0	0	0	0
P	NA1c	1.40889	-78.7682	C	0	0	0	0	0	0	0
P	NA2a	1.56475	-78.8956	C	0	0	0	0	0	0	0
P	NA2b	1.54804	-78.8939	C	0	0	0	0	0	0	0
P	NA2c	1.56444	-78.8686	C	0	0	0	0	0	0	0
P	NA2d	1.52739	-78.8655	C	0	0	0	0	0	0	0
P	NA3a	1.59569	-78.9401	C	0	0	0	0	0	0	0
P	NA3b	1.62744	-79.0001	C	0	0	0	0	0	0	0
P	NA3c	1.61367	-78.9758	C	0	0	0	0	0	0	0
P	NA3d	1.66389	-78.9958	C	0	0	0	0	0	0	0
P	NA4a	1.76503	-78.8868	C	0.275	0.009	20.4131	5.556	0.442	1.471	7.468
P	NA4b	1.76875	-78.8907	C	0	0	0	0	0	0	0
P	NA4c	1.73461	-78.9122	C	0	0	0	0	0	0	0
P	NA4d	1.81328	-78.8391	C	0	0	0	0	0	0	0
P	NA5a	1.80284	-78.8276	C	0	0	0	0	0	0	0
P	NA5b	1.76848	-78.8245	C	0	0	0	0	0	0	0
P	NA5c	1.77331	-78.8217	C	0	0	0	0	0	0	0
P	NA5d	1.74317	-78.8127	C	0	0	0	0	0	0	0
P	NA6a	1.74778	-78.715	C	0	0	0	0	0	0	0
P	NA6b	1.74747	-78.7163	C	0	0	0	0	0	0	0
P	NA6c	1.74522	-78.7667	C	0	0	0	0	0	0	0
P	NA6d	1.74575	-78.7667	C	0	0	0	0	0	0	0
P	NA7a	2.17024	-78.7031	C	0	0	0	0	0	0	0
P	NA7b	2.2167	-78.673	C	0	0	0	0	0	0	0
P	NA7c	1.90519	-78.5383	C	0	0	0	0	0	0	0
P	NA7d	2.00832	-78.6223	C	0	0	0	0	0	0	0
P	NA8a	2.35109	-78.6148	C	0	0	0	0	0	0	0
P	NA8b	2.42762	-78.5814	C	0	0	0	0	0	0	0
P	NA8c	2.2683	-78.6482	C	0	0	0	0	0	0	0
P	NA8d	2.40422	-78.5804	C	0	0	0	0	0	0	0
P	NA9a	2.50422	-78.5082	C	0	0	0	0	0	0	0
P	NA9b	2.42046	-78.4801	C	0	0	0	0	0	0	0
P	NA9c	2.43339	-78.4518	C	0	0	0	0	0	0	0
P	NA10a	2.64261	-78.0215	C	0	0	0	0	0	0	0
P	NA10b	2.59362	-78.0948	C	0	0	0	0	0	0	0
P	CA1a	2.67556	-77.8089	C	0	0	0	0	0	0	0
P	CA1b	2.68065	-77.8935	C	0	0	0	0	0	0	0
P	CA1c	2.62765	-77.8846	C	0	0	0	0	0	0	0
P	CA1d	2.64899	-77.9093	C	0	0	0	0	0	0	0
P	CA2a	2.90173	-77.6977	C	0	0	0	0	0	0	0
P	CA2b	2.83232	-77.6922	C	0	0	0	0	0	0	0
P	CA3a	2.97917	-77.668	C	0	0	0	0	0	0	0
P	CA3b	3.05123	-77.6561	C	0	0	0	0	0	0	0
P	CA3c	3.18778	-77.4787	C	0	0	0	0	0	0	0
P	VC1a	3.36021	-77.4178	C	0	0	0	0	0	0	0
P	VC1b	3.38449	-77.3664	C	0	0	0	0	0	0	0
P	VC2a	3.51281	-77.2652	C	0	0	0	0	0	0	0
P	VC3a	3.6496	-77.1503	C	0	0	0	0	0	0	0
P	VC3b	3.76058	-77.1674	C	0	0	0	0	0	0	0
P	VC4a	3.81916	-77.1134	C	0	0	0	0	0	0	0
P	CH1a	4.29414	-77.4612	C	0	0	0	0	0	0	0
P	CH1b	4.55888	-77.3202	C	0	0	0	0	0	0	0
P	CH1c	4.41821	-77.3522	C	0	0	0	0	0	0	0
P	CH2a	5.39501	-77.4	C	0	0	0	0	0	0	0
P	CH2b	5.19702	-77.3694	C	0	0	0	0	0	0	0
P	CH2c	4.81485	-77.3299	C	0	0	0	0	0	0	0
P	CH3a	5.8405	-77.2692	C	0	0	0	0	0	0	0
P	CH3b	5.78913	-77.2408	C	0	0	0	0	0	0	0
P	CH3c	5.61625	-77.3461	C	0	0	0	0	0	0	0
P	CH3d	5.70809	-77.2644	C	0	0	0	0	0	0	0
CC	AN1a	8.53333	-76.9167	C	0	0	0	0	0	0	0
CC	AN2a	8.01667	-76.9167	C	0	0	0	0	0	0	0
CC	AN2b	8.01667	-76.9167	C	0	0	0	0	0	0	0
CC	AN2c	8.06667	-76.85	C	0	0	0	0	0	0	0
CC	AN2d	8.1	-76.9333	C	0	0	0	0	0	0	0
CC	AN2e	8.11667	-76.9333	C	0	0	0	0	0	0	0
CC	AN2f	8.18333	-76.9333	C	0	0	0	0	0	0	0
CC	CO1a	9.41667	-75.75	C	0	0	0	0	0	0	0
CC	CO2a	9.33333	-75.8667	C	0	0	0	0	0	0	0
CC	CO2b	9.43333	-75.8333	C	0	0	0	0	0	0	0
CC	CO2c	9.4	-75.85	C	0	0	0	0	0	0	0
CC	CO2d	9.41667	-75.8667	C	0	0	0	0	0	0	0
CC	CO2e	9.41667	-75.8833	C	1.7	0.07	22.4	2.6	3.6	3.1	9.3
CC	SU1a	9.46667	-75.6	C	0	0	0	0	0	0	0
CC	SU1b	9.951	-75.576	C	0	0	0	0	0	0	0
CC	SU2a	9.58333	-75.5667	C	0	0	0	0	0	0	0
CC	SU2b	9.58333	-75.5667	C	0	0	0	0	0	0	0
CC	SU3a	9.55	-75.5667	C	0	0	0	0	0	0	0
CC	SU3b	9.46667	-75.6	C	0	0	0	0	0	0	0
CC	SU4a	9.41667	-75.6167	C	0	0	0	0	0	0	0
CC	SU4b	9.4	-75.6333	C	0	0	0	0	0	0	0
CC	SU4c	9.43333	-75.6333	C	0	0	0	0	0	0	0
CC	BO1a	10.1667	-75.7833	C	0	0	0	0	0	0	0
CC	BO2a	9.78333	-75.8167	C	0	0	0	0	0	0	0
CC	BO2b	9.76667	-75.7833	C	0	0	0	0	0	0	0
CC	BO3a	10.1167	-75.5667	C	0	0	0	0	0	0	0
CC	BO3b	10.0667	-75.5333	C	0	0	0	0	0	0	0
CC	BO4a	10.1667	-75.5333	C	0	0	0	0	0	0	0
CC	MA1a	11.3167	-74.1333	C	0	0	0	0	0	0	0
CC	MA1b	11.3333	-74.05	C	0	0	0	0	0	0	0
CC	MA2a	11.05	-74.75	C	0	0	0	0	0	0	0
CC	MA3a	10.9667	-74.5	C	0	0	0	0	0	0	0
CC	MA3b	10.9667	-74.5167	C	0	0	0	0	0	0	0
CC	MA3c	10.8	-74.4667	C	0	0	0	0	0	0	0
CC	MA3d	10.9333	-74.3	C	0	0	0	0	0	0	0
CC	MA3e	10.7833	-74.3667	C	0	0	0	0	0	0	0
CC	MA3f	10.75	-74.3833	C	0	0	0	0	0	0	0
CC	GU1a	11.9167	-71.2833	C	0	0	0	0	0	0	0
CC	GU2a	12.2333	-71.8667	C	0	0	0	0	0	0	0
CC	GU3a	11.3333	-73.2	C	0	0	0	0	0	0	0
CC	GU4a	11.2667	-73.3167	C	3.4	0.08	13.3	11.1	3.9	2.9	17.9
OC	SA1a	12.5657	-81.7044	C	0	0	0	0	0	0	0
OC	SA1b	12.5657	-81.7044	C	0	0	0	0	0	0	0
OC	SA1c	12.5657	-81.7044	C	0	0	0	0	0	0	0
OC	SA1d	12.5657	-81.7044	C	0	0	0	0	0	0	0
OC	SA2a	12.5261	-81.7274	C	0	0	0	0	0	0	0
OC	SA3a	12.555	-81.7089	C	0	0	0	0	0	0	0
OC	SA3b	12.5467	-81.7073	C	0	0	0	0	0	0	0
OC	SA3c	12.5408	-81.7086	C	0	0	0	0	0	0	0
OC	SA4a	12.5241	-81.714	C	0	0	0	0	0	0	0
OC	SA4b	12.5241	-81.714	C	0	0	0	0	0	0	0
OC	SA4c	12.5033	-81.7187	C	0	0	0	0	0	0	0
